# Supplementary material
Source: HighWire-hosted journal article supplement (doi:10.1101/rna.034330.112)
Supplement: SuppFig2_Microarray_data_table.xlsx [file SuppFig2_Microarray_data_table.xlsx]

## Sheet: Sheet1
Annotation:
AffyID	Affymetrix ID
Symbol	MGI Official Gene Symbol
Gene ID	Entrez Gene ID
Cluster	Cluster number
Mock	Expression in mock infected IFNAR KO MEFs
WT	Expression in IFNAR KO MEFs infected with Wild Type Kunjin Virus
sfRNA MUT	Expression in IFNAR KO MEFs infected with sfRNA mutant Kunjin Virus
WT/mock (fold induction)	Fold difference in expression between WT virus infected and mock infected IFNAR KO MEFs
sfRNA MUT/mock (fold induction)	Fold difference in expression between sfRNA mutant virus infected and mock infected IFNAR KO MEFs
sfRNA MUT/WT	Fold difference in expression between sfRNA mutant virus infected and WT infected IFNAR KO MEFs
AffyID	Symbol	GeneID	Cluster	Mock	WT	sfRNA MUT	WT /mock (fold difference)	sfRNA MUT/mock (fold difference)	sfRNA MUT/WT (fold difference)	WT/sfRNA MUT (fold difference)
1426037_a_at	Rgs16	19734	1	34.6817	1729.9	134.522	49.8794	3.87875	0.0777626	12.8596
1422305_at	Ifnb1	15977	1	9.05849	3283.12	303.855	362.436	33.5437	0.0925507	10.8049
1455197_at	Rnd1	223881	1	10.4841	846.522	80.0553	80.7435	7.63589	0.0945697	10.5742
1421578_at	Ccl4	20303	1	36.9038	2046.69	219.522	55.4602	5.94849	0.107257	9.3234
1421009_at	Rsad2	58185	1	8.24726	2285.55	246.855	277.129	29.9318	0.108007	9.25869
1426276_at	Ifih1	71586	1	18.232	1860.8	234.855	102.062	12.8815	0.126212	7.92318
1448325_at	Myd116	17872	1	76.1957	2192.96	284.922	28.7806	3.73934	0.129926	7.69669
1450297_at	Il6	16193	1	29.5956	449.785	73.2013	15.1977	2.47338	0.162747	6.14449
1431591_s_at	Gm9706 /// Isg15	100038882 /// 677168	1	20.7451	1302.11	230.188	62.7671	11.096	0.176781	5.65671
1453344_at	1810032O08Rik	66293	1	51.318	781.392	142.855	15.2265	2.78372	0.182821	5.46983
1419607_at	Tnf	21926	1	13.4076	238.915	49.0036	17.8193	3.6549	0.205109	4.87545
1418847_at	Arg2	11847	1	12.3584	107.522	25.8019	8.70031	2.0878	0.239969	4.16721
1417617_at	St6galnac2	20446	1	32.3947	355.249	89.1889	10.9663	2.75319	0.25106	3.98311
1439071_at	5430416N02Rik	71426	1	33.4835	507.855	128.229	15.1673	3.82962	0.252492	3.96052
1452318_a_at	Hspa1b	15511	1	635.325	5572.94	1502.19	8.7718	2.36444	0.26955	3.70988
1430147_a_at	Taf1d	75316	1	101.636	715.892	193.855	7.04368	1.90735	0.270788	3.69292
1444021_at	Sqstm1	18412	1	71.4003	602.156	166.855	8.43352	2.3369	0.277096	3.60886
1438037_at	Herc5	67138	1	12.7314	108.583	30.3928	8.52875	2.38722	0.279903	3.57267
1424211_at	Slc25a33	70556	1	38.9416	310.827	87.5224	7.98186	2.24753	0.281579	3.5514
1435906_x_at	Gbp2	14469	1	7.61481	74.1991	21.4326	9.74405	2.8146	0.288853	3.46197
1419714_at	Cd274	60533	1	38.0768	287.263	84.5231	7.54432	2.21981	0.294236	3.39864
1430271_x_at	Taf1d	75316	1	64.7848	527.522	157.855	8.14268	2.43661	0.299239	3.34181
1418240_at	Gbp2	14469	1	14.3009	180.978	54.7489	12.655	3.82836	0.302518	3.30559
1418293_at	Ifit2	15958	1	75.1972	1619.93	497.995	21.5424	6.62252	0.307417	3.25291
1418932_at	LOC100046232 /// Nfil3	100046232 /// 18030	1	58.9481	389.039	123.188	6.59968	2.08978	0.316648	3.15808
1435679_at	Optn	71648	1	176.78	1021.52	323.522	5.77849	1.83008	0.316706	3.15751
1437481_at	Trmt61b	68789	1	83.2043	549.188	175.522	6.60048	2.10953	0.319602	3.12889
1418645_at	Hal	15109	1	49.3005	461.311	148.892	9.35714	3.0201	0.322759	3.09829
1437343_x_at	Atad3a	108888	1	48.6135	266.855	86.8671	5.48932	1.78689	0.325522	3.07199
1449591_at	Casp4	12363	1	30.3928	154.473	51.0175	5.08257	1.67861	0.330268	3.02785
1417856_at	Relb	19698	1	26.1912	243.855	81.2051	9.31059	3.10048	0.333005	3.00295
1449310_at	Ptger2	19217	1	12.881	93.9316	31.5833	7.29224	2.45193	0.336238	2.97409
1460415_a_at	Cd40	21939	1	16.8864	88.1276	29.9968	5.21886	1.77639	0.34038	2.9379
1416067_at	Ifrd1	15982	1	713.165	3833.06	1304.86	5.37471	1.82967	0.340422	2.93753
1453228_at	Stx11	74732	1	12.881	94.9923	32.469	7.37459	2.52068	0.341807	2.92563
1440527_at	---	---	1	12.2193	67.7102	23.3477	5.54125	1.91072	0.344818	2.90008
1451382_at	Chac1	69065	1	94.2565	597.522	207.188	6.33931	2.19813	0.346746	2.88395
1460220_a_at	Csf1	12977	1	261.836	1362.19	473.188	5.20245	1.80719	0.347374	2.87874
1460603_at	Samd9l	209086	1	52.0418	371.385	129.522	7.13628	2.4888	0.348753	2.86736
1434380_at	Gbp6	229900	1	49.6108	469.188	163.764	9.45739	3.30097	0.349036	2.86503
1426065_a_at	Trib3	228775	1	164.366	763.855	268.855	4.64729	1.63571	0.351971	2.84114
1425099_a_at	Arntl	11865	1	48.699	274.612	97.1884	5.63896	1.9957	0.353912	2.82556
1433699_at	Tnfaip3	21929	1	22.0407	304.432	108.522	13.8123	4.9237	0.356473	2.80527
1453582_at	Chka	12660	1	76.2299	384.901	137.522	5.04922	1.80404	0.357291	2.79884
1449473_s_at	Cd40	21939	1	29.0633	170.217	60.952	5.85676	2.09722	0.358085	2.79263
1425519_a_at	Cd74	16149	1	9.11305	41.5328	14.9109	4.55751	1.63621	0.359014	2.78541
1455841_s_at	Grwd1	101612	1	75.877	381.188	137.957	5.02377	1.81817	0.361914	2.76309
1453782_at	3021401C12Rik	70678	1	13.8829	90.1376	32.7525	6.49269	2.35919	0.363361	2.75208
1418401_a_at	Dusp16	70686	1	59.5225	260.188	95.7263	4.37126	1.60824	0.367911	2.71805
1443536_at	Slc7a11	26570	1	11.3414	55.4866	20.638	4.8924	1.81971	0.371946	2.68856
1431352_s_at	Pvt1	19296	1	87.1972	459.622	171.522	5.27106	1.96706	0.37318	2.67967
1440076_at	---	---	1	37.0258	217.522	81.8579	5.87487	2.21084	0.376321	2.65731
1437100_x_at	Pim3	223775	1	67.8531	356.188	134.315	5.2494	1.9795	0.37709	2.65188
1442014_at	---	---	1	96.4736	415.855	156.855	4.31056	1.62589	0.377187	2.65121
1425066_a_at	Mtmr14	97287	1	43.1183	211.663	80.0596	4.9089	1.85675	0.37824	2.64382
1450643_s_at	Acsl1	14081	1	26.3424	137.79	52.1614	5.23074	1.98013	0.378556	2.64161
1422924_at	Tnfsf9	21950	1	25.3843	208.188	79.1513	8.20146	3.11812	0.380191	2.63026
1456225_x_at	Trib3	228775	1	224.188	957.632	364.184	4.27155	1.62446	0.380296	2.62953
1452324_at	Pvt1	19296	1	119.736	554.522	212.286	4.6312	1.77295	0.382827	2.61215
1439221_s_at	Cd40	21939	1	41.8879	231.188	88.5223	5.51922	2.11331	0.382901	2.61164
1434942_at	Esf1	66580	1	36.0763	149.443	57.6721	4.14241	1.59861	0.385914	2.59125
1452483_a_at	Cd44	12505	1	67.2142	333.902	129.522	4.96773	1.927	0.387903	2.57796
1426818_at	Arrdc4	66412	1	220.522	997.105	388.964	4.52157	1.76384	0.390094	2.56349
1448914_a_at	Csf1	12977	1	73.2013	470.963	188.188	6.43381	2.57083	0.399582	2.50262
1449498_at	Marco	17167	1	11.2636	60.952	24.3951	5.41142	2.16584	0.400235	2.49853
1428093_at	Trabd	67976	1	79.3655	336.036	134.522	4.23403	1.69496	0.400319	2.49801
1435460_at	Prkg2	19092	1	144.724	791.272	323.522	5.46747	2.23544	0.408863	2.44581
1437127_at	A630033E08Rik	240041	1	70.6315	287.522	118.522	4.07073	1.67803	0.412218	2.4259
1457587_at	Kcnq5	226922	1	15.3812	82.9218	34.2734	5.3911	2.22826	0.413322	2.41942
1431705_a_at	Mcoln2	68279	1	43.5604	196.335	81.5244	4.5072	1.87153	0.41523	2.4083
1443863_at	Fndc3a	319448	1	27.4547	118.855	49.5759	4.32914	1.80574	0.417113	2.39743
1448574_at	Nme6	54369	1	36.7609	191.412	80.1917	5.20696	2.18144	0.418947	2.38694
1433656_a_at	Gnl3	30877	1	612.049	2228.57	934.188	3.64116	1.52633	0.419188	2.38557
1421267_a_at	Cited2	17684	1	45.8655	181.681	76.1957	3.96116	1.66129	0.419394	2.3844
1436460_at	Tmem194	210035	1	13.277	53.5766	22.5479	4.0353	1.69827	0.420853	2.37612
1419942_at	Srxn1	76650	1	224.558	856.522	361.188	3.81425	1.60844	0.421692	2.3714
1417499_at	Timm10	30059	1	140.623	535.088	228.188	3.80514	1.6227	0.42645	2.34494
1433675_at	Snhg1	83673	1	566.798	2118.37	911.855	3.73744	1.60878	0.43045	2.32315
1422562_at	Rrad	56437	1	10.3499	41.4454	17.8433	4.00444	1.72401	0.430525	2.32275
1417233_at	Chchd4	72170	1	67.1236	253.522	109.299	3.77694	1.62833	0.431124	2.31952
1455084_x_at	Shmt2	108037	1	94.1887	344.522	148.815	3.65778	1.57997	0.431948	2.31509
1457780_at	Stx11	74732	1	21.8985	83.7669	36.1944	3.82523	1.65282	0.432084	2.31436
1444796_at	C76876	97129	1	12.9074	49.1932	21.2618	3.81123	1.64725	0.43221	2.31369
1423436_at	Gsta3	14859	1	15.3812	108.335	47.1287	7.04332	3.06403	0.435027	2.29871
1442793_s_at	LOC100046166 /// Tbrg4	100046166 /// 21379	1	96.1885	354.172	154.242	3.68206	1.60354	0.435501	2.29621
1437088_at	Sdad1	231452	1	70.0842	249.188	108.863	3.55556	1.55332	0.436871	2.28901
1415694_at	Wars	22375	1	61.9407	281.188	123.159	4.53964	1.98834	0.437995	2.28313
1451722_s_at	Smyd5	232187	1	31.9555	118.698	52.0876	3.71448	1.63	0.438824	2.27882
1459764_x_at	Snx10	71982	1	81.496	385.855	171.522	4.73465	2.10466	0.444524	2.2496
1434813_x_at	Wars	22375	1	179.878	711.855	318.421	3.95743	1.7702	0.447311	2.23558
1434754_at	Garnl4	380711	1	22.5479	100.529	45.225	4.45845	2.00573	0.449871	2.22286
1429692_s_at	Gch1	14528	1	14.1149	69.1934	31.3162	4.90215	2.21866	0.45259	2.20951
1450957_a_at	Sqstm1	18412	1	835.522	3143.07	1436.49	3.76181	1.71928	0.457034	2.18802
1429412_at	Eny2	223527	1	14.3318	47.7295	21.8985	3.33033	1.52797	0.458804	2.17958
1418825_at	Irgm1	15944	1	29.8235	110.362	51.0089	3.7005	1.71036	0.462197	2.16358
1419838_s_at	Plk4	20873	1	43.9418	192.751	89.1889	4.38652	2.02971	0.462715	2.16116
1451272_a_at	Ube2f	67921	1	138.521	453.188	210.188	3.27162	1.51738	0.463799	2.15611
1450173_at	Ripk2	192656	1	24.3543	150.855	70.0511	6.1942	2.87634	0.46436	2.1535
1417801_a_at	Ppfibp2	19024	1	13.7325	55.7203	26.1063	4.05754	1.90106	0.468524	2.13436
1429422_at	4933412E12Rik	71086	1	77.8608	293.029	137.522	3.76351	1.76625	0.46931	2.13079
1433453_a_at	Abtb2	99382	1	39.8153	121.11	57.1667	3.0418	1.4358	0.472023	2.11854
1437581_at	Zfp800	627049	1	38.0768	126.942	59.9676	3.33384	1.57491	0.472401	2.11684
1447491_at	---	---	1	17.419	57.8061	27.3312	3.31856	1.56905	0.472809	2.11502
1421307_at	Car13	71934	1	38.0768	124.193	58.8263	3.26164	1.54494	0.473668	2.11118
1416730_at	Rcl1	59028	1	26.1542	99.1884	46.9893	3.79245	1.79663	0.473738	2.11087
1447986_at	D17892	97670	1	30.504	159.855	75.8817	5.24047	2.4876	0.474691	2.10664
1448271_a_at	Ddx21	56200	1	51.0356	153.855	73.1019	3.01466	1.43237	0.475135	2.10466
1423883_at	Acsl1	14081	1	145.188	820.332	391.251	5.65012	2.69478	0.476943	2.09669
1433674_a_at	Snhg1	83673	1	917.821	3147.08	1505.86	3.42886	1.64068	0.478493	2.0899
1433807_at	6720463M24Rik	77744	1	71.2139	244.855	117.522	3.4383	1.65026	0.479964	2.08349
1422272_at	Phxr4	18689	1	28.9593	107.849	51.8567	3.72417	1.79067	0.480825	2.07976
1417584_at	Slc11a2	18174	1	28.0813	93.1886	44.9106	3.31853	1.59931	0.481933	2.07498
1421266_s_at	Nfkbib	18036	1	36.6482	130.277	62.9316	3.55481	1.71718	0.48306	2.07014
1450764_at	Aoah	27052	1	131.835	632.187	306.188	4.79529	2.32251	0.484332	2.0647
1452839_at	Dph5	69740	1	67.5778	232.188	113.461	3.43587	1.67897	0.488658	2.04642
1417032_at	Ube2g2	22213	1	185.188	577.093	283.188	3.11625	1.52919	0.490716	2.03784
1446972_at	D15Wsu126e	28112	1	21.2618	64.7274	31.8244	3.04431	1.49679	0.491668	2.03389
1451414_at	Nop16	28126	1	21.6056	68.2307	33.5597	3.15801	1.55329	0.491857	2.03311
1438052_at	A130071D04Rik	320791	1	24.8953	80.525	39.8153	3.23455	1.59931	0.494446	2.02247
1421457_a_at	Samsn1	67742	1	14.698	45.5583	22.53	3.09964	1.53287	0.494531	2.02212
1416890_at	Wdr74	107071	1	82.5515	265.653	131.522	3.21803	1.59321	0.495088	2.01984
1416939_at	Ppa1	67895	1	73.3066	233.188	116.271	3.181	1.58609	0.498612	2.00557
1452078_a_at	Slc11a2	18174	1	44.7018	188.522	94.1885	4.21732	2.10704	0.499616	2.00154
1417140_a_at	Ptpn2	19255	1	199.875	616.268	308.188	3.08326	1.5419	0.500088	1.99965
1416270_at	Polr2g	67710	1	339.789	1355.86	680.949	3.99029	2.00404	0.502229	1.99113
1442659_at	Pcdh9	211712	1	52.8168	159.742	80.5542	3.02445	1.52516	0.504278	1.98303
1449314_at	Zfpm2	22762	1	104.855	355.635	180.437	3.39169	1.72082	0.507365	1.97097
1418842_at	Hcls1	15163	1	25.0976	113.12	57.4449	4.50719	2.28886	0.507824	1.96919
1421260_a_at	Srm	20810	1	209.304	694.855	353.063	3.31983	1.68684	0.508111	1.96807
1440553_at	Mecr	26922	1	12.881	40.4099	20.6008	3.13717	1.59931	0.509794	1.96158
1428261_at	Ccdc134	76457	1	16.2499	49.1997	25.0976	3.02769	1.54448	0.510117	1.96033
1442015_at	2500002B13Rik	78353	1	39.4492	118.855	60.6395	3.01287	1.53715	0.510197	1.96003
1420697_at	Slc15a3	65221	1	72.2558	407.008	208.188	5.63289	2.88127	0.511509	1.955
1437832_x_at	LOC100046672 /// Wars	100046672 /// 22375	1	79.3381	241.108	124.522	3.03899	1.56951	0.516457	1.93627
1447685_x_at	Ets2	23872	1	38.9416	131.359	68.2395	3.37324	1.75235	0.519487	1.92498
1449009_at	Tgtp /// Tgtp2	100039796 /// 21822	1	7.35884	22.1305	11.5026	3.00734	1.5631	0.519762	1.92396
1424785_at	Angptl6	70726	1	36.3743	126.325	65.8991	3.47294	1.8117	0.521662	1.91695
1446117_at	Spire1	68166	1	25.5378	88.276	46.1515	3.45668	1.80718	0.52281	1.91274
1421963_a_at	Cdc25b	12531	1	72.215	227.188	119.114	3.146	1.64943	0.524295	1.90732
1441855_x_at	Cxcl1	14825	1	57.3323	180.188	94.6392	3.14288	1.65071	0.525224	1.90395
1448291_at	Mmp9	17395	1	25.8019	101.49	53.6778	3.93342	2.08038	0.528899	1.89072
1452207_at	Cited2	17684	1	1491.86	4832.62	2556.52	3.23934	1.71365	0.529013	1.89031
1439622_at	Rassf4	213391	1	138.522	606.619	321.522	4.37924	2.32109	0.530022	1.88671
1438097_at	Rab20	19332	1	17.8433	95.3776	50.6054	5.34529	2.8361	0.53058	1.88473
1416184_s_at	Hmga1	15361	1	267.541	839.353	455.522	3.13728	1.70262	0.542706	1.84262
1435040_at	Irak3	73914	1	83.9582	261.188	142.098	3.11093	1.69249	0.544046	1.83808
1435432_at	Agap1	347722	1	52.8168	161.918	88.1529	3.06565	1.66903	0.54443	1.83678
1449799_s_at	Pkp2	67451	1	32.3054	106.522	58.7619	3.29734	1.81895	0.551642	1.81277
1449149_at	Traf3	22031	1	25.8019	95.7267	52.8168	3.71007	2.04702	0.551746	1.81243
1450387_s_at	Ak3l1 /// LOC100047616	100047616 /// 11639	1	68.1235	220.522	123.19	3.23709	1.80834	0.558631	1.79009
1448782_at	Txndc11	106200	1	127.522	448.305	252.522	3.51552	1.98023	0.563281	1.77531
1436562_at	Ddx58	230073	1	17.3371	66.8924	38.0147	3.85834	2.19268	0.568296	1.75965
1420197_at	Gadd45b	17873	1	95.111	307.252	175.522	3.23046	1.84544	0.571262	1.75051
1448205_at	Ccnb1	268697	1	47.9963	183.854	105.522	3.83059	2.19854	0.573942	1.74234
1420331_at	Clec4e	56619	1	10.8828	39.5024	23.0548	3.62981	2.11847	0.583631	1.71341
1425902_a_at	Nfkb2	18034	1	50.1079	176.855	103.746	3.52949	2.07045	0.586615	1.7047
1417516_at	Ddit3	13198	1	625.522	2375.85	1426.69	3.79818	2.2808	0.600497	1.66529
1434774_at	Rhbdf2	217344	1	24.4614	78.5266	47.7295	3.21023	1.95122	0.607813	1.64524
1460536_at	2310079F09Rik	70290	1	25.8019	84.3426	51.4111	3.26886	1.99253	0.609551	1.64055
1423714_at	Asf1b	66929	1	46.1198	138.522	85.1849	3.00352	1.84703	0.614957	1.62613
1417267_s_at	Fkbp11	66120	1	104.287	326.555	208.188	3.13132	1.9963	0.637529	1.56856
1431609_a_at	Acp5	11433	1	11.8645	36.3282	23.4083	3.06191	1.97297	0.644358	1.55193
1431095_a_at	Herc5	67138	1	8.91134	26.8477	17.5653	3.01275	1.97111	0.654257	1.52845
1452388_at	Hspa1a	193740	2	13.6536	714.855	19.035	52.3566	1.39414	0.0266278	37.5547
1449133_at	Sprr1a	20753	2	9.88963	367.522	10.5001	37.1623	1.06173	0.0285701	35.0016
1437458_x_at	Clu /// LOC100046120	100046120 /// 12759	2	13.6882	188.522	9.57213	13.7726	0.699297	0.0507747	19.6949
1417601_at	Rgs1	50778	2	24.7416	581.296	36.8877	23.4946	1.49092	0.0634577	15.7585
1425295_at	Ear11	93726	2	8.32026	143.013	9.67563	17.1885	1.1629	0.0676558	14.7807
1454849_x_at	Clu /// LOC100046120	100046120 /// 12759	2	24.7657	286.522	19.5625	11.5693	0.789901	0.0682756	14.6465
1416200_at	Il33	77125	2	78.8597	330.17	22.5479	4.1868	0.285924	0.0682919	14.643
1420404_at	Cd86	12524	2	13.6882	219.681	15.0882	16.0489	1.10228	0.0686824	14.5598
1434196_at	Dnaja4	58233	2	42.486	471.87	34.5835	11.1065	0.813998	0.0732903	13.6444
1418591_at	Dnaja4	58233	2	38.9416	829.297	60.8697	21.2959	1.5631	0.0733992	13.6241
1418626_a_at	Clu /// LOC100046120	100046120 /// 12759	2	9.23621	105.5	7.80769	11.4224	0.845335	0.0740066	13.5123
1449363_at	Atf3	11910	2	67.4328	1947.86	151.855	28.8859	2.25195	0.0779601	12.8271
1416756_at	Dnajb1	81489	2	52.8168	1034.53	80.6587	19.5871	1.52714	0.0779666	12.826
1424339_at	Oasl1	231655	2	10.5001	210.313	17.2995	20.0295	1.64755	0.0822561	12.1572
1427081_at	A630072M18Rik	320770	2	13.6882	285.052	23.7891	20.8246	1.73792	0.0834552	11.9825
1416755_at	Dnajb1	81489	2	152.863	2541.86	214.041	16.6283	1.40021	0.0842066	11.8755
1449858_at	Cd86	12524	2	11.3166	207.247	18.4019	18.3136	1.6261	0.088792	11.2623
1427126_at	Hspa1b	15511	2	58.0056	1941.02	173.312	33.4626	2.98786	0.0892893	11.1995
1418835_at	Phlda1	21664	2	39.5457	1087.03	97.1884	27.488	2.45763	0.0894073	11.1848
1451452_a_at	Rgs16	19734	2	15.3669	161.783	14.5573	10.528	0.947315	0.0899806	11.1135
1427127_x_at	Hspa1b	15511	2	101.939	2248.86	207.476	22.0608	2.03529	0.0922583	10.8391
1417487_at	Fosl1	14283	2	10.5001	151.687	14.5573	14.4462	1.38639	0.0959694	10.42
1418687_at	Arc	11838	2	9.17289	80.7335	7.99386	8.80132	0.871465	0.0990153	10.0994
1437689_x_at	Clu /// LOC100046120	100046120 /// 12759	2	7.75671	73.5513	7.35884	9.48228	0.948707	0.100051	9.99495
1427854_x_at	Hsp25-ps1	15508	2	98.5063	1140.68	118.522	11.5798	1.20319	0.103904	9.62426
1436172_at	9530028C05	330256	2	8.59561	101.188	10.7119	11.7721	1.2462	0.105861	9.44639
1427853_a_at	Hsp25-ps1	15508	2	112.602	1370.36	147.61	12.1699	1.3109	0.107717	9.28359
1427736_a_at	Ccrl2	54199	2	14.5573	305.977	34.8503	21.0188	2.39401	0.113898	8.77975
1434350_at	Csrnp1	215418	2	43.5714	786.855	90.9085	18.059	2.08642	0.115534	8.65546
1455265_a_at	Rgs16	19734	2	75.1972	1323.82	153.855	17.6046	2.04602	0.116221	8.60431
1434574_at	9430008C03Rik	68108	2	21.672	353.855	42.7583	16.3277	1.97297	0.120836	8.27571
1432026_a_at	Herc5	67138	2	10.3777	126.188	15.5689	12.1596	1.50023	0.123378	8.10517
1419676_at	Mx2	17858	2	7.41782	82.7289	10.2137	11.1527	1.37692	0.12346	8.09976
1425964_x_at	Hspb1	15507	2	274.855	2657.82	332.188	9.66991	1.20859	0.124985	8.00095
1418592_at	Dnaja4	58233	2	13.6504	92.1886	11.8609	6.75357	0.868906	0.128659	7.7725
1419697_at	Cxcl11	56066	2	12.1911	193.855	25.0976	15.9014	2.05869	0.129466	7.72404
1423566_a_at	Hsph1	15505	2	138.799	1305.51	171.522	9.40575	1.23575	0.131383	7.61134
1422943_a_at	Hspb1	15507	2	385.466	3553.52	468.101	9.21877	1.21438	0.131729	7.59136
1436387_at	C330006P03Rik	320588	2	18.975	141.856	18.975	7.47592	1	0.133763	7.47592
1452161_at	Tiparp	99929	2	22.5479	169.522	23.0548	7.51829	1.02248	0.135999	7.35298
1416783_at	Tac1	21333	2	32.7525	196.281	27.7968	5.99285	0.848691	0.141617	7.06128
1424518_at	Apol9a /// Apol9b	223672 /// 71898	2	9.51716	101.923	14.5573	10.7094	1.52958	0.142827	7.00149
1418392_a_at	Gbp3	55932	2	14.5573	246.107	35.2043	16.9061	2.41833	0.143044	6.99084
1457035_at	AI607873	226691	2	62.9264	425.188	62.0203	6.75691	0.9856	0.145865	6.85563
1419603_at	Ifi204	15951	2	17.8433	194.249	28.58	10.8864	1.60172	0.147131	6.79666
1431182_at	Gm7899 /// Hspa8 /// LOC624853 /// LOC641192	15481 /// 624853 /// 641192 /// 666031	2	29.44	186.188	27.66	6.32433	0.939537	0.148559	6.73133
1425156_at	Gbp6	229900	2	12.881	179.066	26.9564	13.9016	2.09272	0.150539	6.64281
1437199_at	---	---	2	34.215	300.855	45.979	8.79308	1.34383	0.152828	6.54332
1420550_at	Lce1f	67828	2	6.44315	49.0221	7.58804	7.60841	1.17769	0.154788	6.46044
1420499_at	Gch1	14528	2	14.5172	185.926	29.6272	12.8073	2.04084	0.15935	6.2755
1453196_a_at	Oasl2	23962	2	6.61801	85.8067	13.6882	12.9656	2.06833	0.159524	6.26865
1450906_at	LOC100044106 /// Plxnc1	100044106 /// 54712	2	31.1689	156.855	25.2353	5.03242	0.809632	0.160883	6.21569
1429029_at	Sgms2	74442	2	12.2193	86.9882	14.0596	7.11892	1.15061	0.161627	6.18709
1440227_at	Slc5a3	53881	2	20.2676	179.544	29.6272	8.85868	1.4618	0.165014	6.0601
1455581_x_at	9530028C05	330256	2	11.5238	106.436	17.7583	9.23616	1.54101	0.166845	5.99357
1435402_at	Gramd1b	235283	2	51.8567	539.854	90.5208	10.4105	1.7456	0.167677	5.96386
1451340_at	Arid5a	214855	2	13.277	74.3601	12.6128	5.60067	0.949974	0.169618	5.89561
1455618_x_at	Tspan33	232670	2	8.66155	63.8751	10.8491	7.37456	1.25256	0.169848	5.88761
1453345_at	Nipal1	70701	2	9.93907	57.1845	9.93907	5.75351	1	0.173807	5.75351
1436200_at	Lonrf3	74365	2	46.7945	342.451	59.7463	7.3182	1.27678	0.174467	5.73175
1428654_at	1200016B10Rik	66875	2	25.8019	165.815	29.0209	6.42648	1.12476	0.17502	5.71364
1419675_at	Ngf	18049	2	173.278	834.522	146.636	4.81607	0.846247	0.175713	5.6911
1425837_a_at	Ccrn4l /// LOC100047134	100047134 /// 12457	2	77.314	829.163	146.855	10.7246	1.89946	0.177112	5.64613
1434046_at	AA467197	433470	2	12.2193	142.517	25.4367	11.6633	2.08168	0.178482	5.60282
1455679_at	Obfc2a	109019	2	45.8655	169.483	30.3928	3.69521	0.66265	0.179327	5.57642
1415854_at	Kitl	17311	2	17.419	87.4141	15.8673	5.01832	0.910921	0.181519	5.50906
1421207_at	Lif	16878	2	29.8235	213.801	39.0315	7.16888	1.30875	0.18256	5.47766
1445381_at	---	---	2	36.4807	252.052	46.1515	6.90919	1.2651	0.183103	5.46139
1442506_at	---	---	2	10.5001	60.7477	11.1353	5.78542	1.06049	0.183304	5.45542
1453939_x_at	Gm9706	677168	2	5.67147	46.0651	8.4494	8.12226	1.48981	0.183423	5.45188
1439093_at	---	---	2	9.67563	71.5366	13.3568	7.39348	1.38045	0.186712	5.35583
1449902_at	Lce1a2 /// Lce1c /// Lce1f /// Lce1g /// Lce1h	66195 /// 67718 /// 67828 /// 73719 /// 73722	2	9.26844	61.6265	11.5238	6.64907	1.24334	0.186994	5.34776
1428378_at	Zc3hav1	78781	2	10.2137	72.9641	13.7304	7.14371	1.3443	0.18818	5.31407
1416601_a_at	Rcan1	54720	2	16.9484	115.077	21.8985	6.78988	1.29207	0.190294	5.25503
1422860_at	Nts	67405	2	8.18768	53.424	10.4534	6.52492	1.27673	0.19567	5.11066
1438588_at	Plagl1	22634	2	25.0976	126.959	25.0976	5.05862	1	0.197683	5.05862
1418350_at	Hbegf	15200	2	22.3719	148.833	29.6272	6.65266	1.3243	0.199064	5.02352
1426721_s_at	Tiparp	99929	2	76.1957	361.391	71.9601	4.74293	0.944412	0.19912	5.0221
1422526_at	Acsl1	14081	2	15.3812	112.532	22.5314	7.31616	1.46486	0.200223	4.99444
1441887_x_at	Gm6377	622976	2	8.22044	49.6164	10.2137	6.03574	1.24248	0.205854	4.85781
1450004_at	Tslp	53603	2	8.88263	44.7641	9.24425	5.03951	1.04071	0.20651	4.84237
1416600_a_at	Rcan1	54720	2	127.815	829.355	171.522	6.48871	1.34195	0.206813	4.83528
1418776_at	5830443L24Rik	76074	2	11.5579	64.907	13.4407	5.61582	1.1629	0.207076	4.82915
1443394_at	---	---	2	22.6719	76.1957	15.9295	3.36079	0.70261	0.209061	4.7833
1423134_at	Rilpl2	80291	2	61.1811	551.188	115.241	9.00913	1.88361	0.209078	4.78291
1440865_at	Ifitm6	213002	2	11.2232	103.188	21.8086	9.19421	1.94317	0.211347	4.73155
1436895_at	Arap2	212285	2	7.56811	43.7252	9.2643	5.77756	1.22412	0.211875	4.71975
1436576_at	Fam26f	215900	2	9.81568	77.1944	16.3691	7.8644	1.66765	0.21205	4.71586
1447242_at	---	---	2	10.2863	66.4203	14.1149	6.45718	1.37221	0.212509	4.70568
1460667_at	U90926	57425	2	8.39446	41.5791	8.88263	4.95315	1.05815	0.213632	4.68094
1424354_at	Tmem140	68487	2	120.489	549.188	117.523	4.558	0.975384	0.213994	4.67303
1454224_at	2010300F17Rik	69884	2	13.6882	74.8226	16.0854	5.46621	1.17513	0.21498	4.65159
1448793_a_at	Sdc4	20971	2	22.468	140.522	30.2509	6.25429	1.3464	0.215276	4.64521
1451608_a_at	Tspan33	232670	2	9.93907	62.4193	13.4469	6.2802	1.35293	0.215428	4.64191
1435454_a_at	BC006779	229003	2	26.1064	162.858	35.2043	6.23825	1.34849	0.216165	4.62609
1452348_s_at	Gm2785 /// Ifi203 /// Ifi204 /// Ifi205 /// LOC192690 /// LOC640890 /// Mnda	100040462 /// 15950 /// 15951 /// 192690 /// 226695 /// 381308 /// 640890	2	20.1638	141.451	30.6978	7.01511	1.52242	0.21702	4.60787
1459894_at	Iqgap2	544963	2	16.4132	75.1972	16.4132	4.58152	1	0.218268	4.58152
1450264_a_at	Chka	12660	2	63.5765	459.522	100.432	7.22785	1.57971	0.218558	4.57544
1451021_a_at	Klf5	12224	2	9.19626	43.3904	9.67563	4.71827	1.05213	0.22299	4.4845
1427929_a_at	Pdxk	216134	2	84.0919	352.522	79.4648	4.1921	0.944976	0.225418	4.4362
1429466_s_at	Aph1b /// Aph1c	208117 /// 68318	2	90.9736	322.522	72.8218	3.54522	0.800472	0.225789	4.42892
1437868_at	Fam46a	212943	2	74.9429	401.188	90.6346	5.35325	1.20938	0.225915	4.42644
1426286_at	Noc3l	57753	2	17.8433	74.1991	16.779	4.15837	0.940356	0.226135	4.42213
1443468_at	---	---	2	13.6882	90.1626	20.4658	6.58688	1.49514	0.226988	4.40552
1454399_at	Fam23a	625286	2	9.07375	44.6383	10.2137	4.9195	1.12564	0.228811	4.37041
1452859_at	1200016B10Rik	66875	2	26.1017	138.522	31.7662	5.30699	1.21701	0.229323	4.36067
1418580_at	Rtp4	67775	2	9.99945	75.423	17.2995	7.54272	1.73005	0.229366	4.35984
1436080_at	AW011738	100382	2	7.75671	35.6236	8.18768	4.59262	1.05556	0.229839	4.35088
1450728_at	Fjx1	14221	2	44.0913	240.855	55.8411	5.46265	1.26649	0.231845	4.31322
1450484_a_at	Cmpk2	22169	2	8.34811	46.7945	10.8828	5.6054	1.30362	0.232565	4.29987
1419431_at	Ereg	13874	2	164.031	999.312	233.188	6.0922	1.42161	0.233349	4.28543
1417065_at	Egr1	13653	2	1571.52	5372.19	1258.83	3.41846	0.801025	0.234323	4.26761
1423904_a_at	Pvr	52118	2	16.3691	92.7981	21.8642	5.6691	1.3357	0.23561	4.24429
1450672_a_at	Trex1	22040	2	38.0768	196.895	46.6611	5.171	1.22545	0.236985	4.21968
1455885_at	Amz1	231842	2	18.7111	111.258	26.5175	5.94608	1.4172	0.238342	4.19565
1429106_at	4921509J17Rik	70857	2	32.8729	202.188	48.3563	6.15061	1.47101	0.239165	4.18122
1432059_x_at	5031425E22Rik	75977	2	11.1967	47.7548	11.4265	4.26508	1.02052	0.239274	4.17931
1435162_at	Prkg2	19092	2	16.8864	106.911	25.7852	6.33121	1.52698	0.241183	4.14623
1452349_x_at	Ifi205 /// Mnda	226695 /// 381308	2	20.9839	109.937	26.5175	5.23911	1.2637	0.241206	4.14584
1421008_at	Rsad2	58185	2	5.62916	39.0495	9.48867	6.93701	1.68563	0.242991	4.11538
1418507_s_at	Socs2	216233	2	34.377	153.805	37.5621	4.47406	1.09265	0.244219	4.09469
1424759_at	Arrdc4	66412	2	14.5573	71.3314	17.6474	4.90005	1.21227	0.2474	4.04204
1429194_at	Tigd2	68140	2	47.0953	315.386	78.1933	6.69676	1.66032	0.247929	4.03341
1418879_at	Fam110c	104943	2	10.1383	43.7252	10.8828	4.31286	1.07343	0.24889	4.01783
1417372_a_at	Peli1	67245	2	123.188	591.843	147.748	4.80438	1.19936	0.24964	4.00577
1419549_at	Arg1	11846	2	28.8852	102.188	25.5916	3.53774	0.885977	0.250436	3.99304
1448437_a_at	Gtpbp2	56055	2	115.522	746.105	191.151	6.45857	1.65467	0.256198	3.90323
1439623_at	---	---	2	27.0641	129.28	33.1352	4.77682	1.22433	0.256306	3.90159
1420699_at	Clec7a	56644	2	20.5219	87.8572	22.5479	4.28114	1.09872	0.256643	3.89647
1427682_a_at	Egr2	13654	2	65.8991	223.136	57.6847	3.38602	0.875348	0.258518	3.8682
1452394_at	Cars	27267	2	68.7416	214.95	55.7203	3.12693	0.810576	0.259224	3.85767
1456684_at	Tmem74	239408	2	7.1964	27.7592	7.1964	3.85737	1	0.259244	3.85737
1436850_at	Creg2	263764	2	10.9071	57.6721	14.9913	5.28758	1.37445	0.25994	3.84704
1452160_at	Tiparp	99929	2	67.5548	231.008	60.6043	3.41956	0.897113	0.262347	3.81174
1448170_at	Siah2	20439	2	14.1149	90.9657	24.1602	6.44464	1.71168	0.265597	3.7651
1422168_a_at	Bdnf	12064	2	37.4988	236.335	62.8581	6.30249	1.67627	0.26597	3.75982
1427957_at	9530008L14Rik	109254	2	9.93907	43.1004	11.4969	4.33646	1.15673	0.266746	3.74888
1415941_s_at	Zfand2a	100494	2	147.855	518.958	138.771	3.50991	0.938562	0.267403	3.73967
1427194_a_at	Ercc8	71991	2	12.4219	47.7295	12.8016	3.84238	1.03057	0.268212	3.72839
1426450_at	Plcl2	224860	2	38.0768	144.112	38.7104	3.78478	1.01664	0.268613	3.72283
1459835_s_at	Dnaja1	15502	2	221.255	773.983	208.188	3.49814	0.940942	0.268983	3.71771
1453727_at	Esf1	66580	2	19.7199	70.3202	18.975	3.56595	0.962228	0.269838	3.70593
1435313_at	Cd200r4	239849	2	65.8991	243.759	65.8991	3.69896	1	0.270346	3.69896
1415940_at	Zfand2a	100494	2	184.188	716.459	193.855	3.88982	1.05248	0.270574	3.69585
1418253_a_at	Hspa4l	18415	2	20.0275	73.8225	20.0275	3.68606	1	0.271292	3.68606
1435229_at	Gramd1b	235283	2	38.0768	136.253	36.996	3.57837	0.971615	0.271524	3.68291
1451160_s_at	Pvr	52118	2	118.115	584.855	159.184	4.95159	1.34771	0.272177	3.67408
1425322_at	Gm13271 /// Gm13275 /// Gm13276 /// Gm13290 /// Ifnz /// LOC641172	319146 /// 435791 /// 545646 /// 545649 /// 545652 /// 641172	2	15.9765	53.4054	14.5573	3.34275	0.91117	0.272581	3.66864
1454109_a_at	Jmjd6	107817	2	44.7946	188.522	51.5989	4.20858	1.1519	0.273703	3.6536
1418471_at	Pgf	18654	2	10.5001	44.4615	12.189	4.23437	1.16084	0.274147	3.64768
1451905_a_at	Mx1	17857	2	7.70763	37.221	10.2137	4.82911	1.32515	0.274408	3.64421
1456094_at	Usp36	72344	2	23.0548	80.1816	22.0602	3.47787	0.956858	0.275128	3.63467
1441843_s_at	5230400M03Rik	329406	2	23.0548	91.1887	25.0976	3.9553	1.08861	0.275227	3.63336
1428010_at	Timm9	30056	2	20.0275	72.1975	20.0275	3.60492	1	0.277399	3.60492
1455995_at	D10Bwg1379e	215821	2	10.0946	50.6677	14.1149	5.01929	1.39827	0.278579	3.58965
1422408_at	Ifna4	15967	2	7.10396	25.0976	6.997	3.53291	0.984943	0.278791	3.58691
1417409_at	Jun	16476	2	136.648	655.855	183.074	4.7996	1.33975	0.279138	3.58245
1419569_a_at	Isg20	57444	2	11.7521	49.6164	13.8672	4.22193	1.17998	0.279487	3.57798
1415855_at	Kitl	17311	2	36.6482	115.223	32.3875	3.14402	0.883742	0.281086	3.55763
1428390_at	Wdr43	72515	2	58.0772	250.188	70.3639	4.30786	1.21156	0.281244	3.55563
1418323_at	Fem1b	14155	2	30.3928	97.1644	27.4066	3.19696	0.901747	0.282064	3.54529
1449702_at	Zfand2a	100494	2	223.522	767.687	218.522	3.43451	0.977631	0.28465	3.51309
1455930_at	---	---	2	116.493	691.15	198.188	5.93296	1.70128	0.286751	3.48734
1438841_s_at	Arg2	11847	2	25.7066	116.855	33.5597	4.54572	1.30549	0.287191	3.482
1450693_at	Rgs17	56533	2	12.2028	53.5575	15.3812	4.38894	1.26046	0.287191	3.482
1455682_at	Abl2	11352	2	99.0086	377.188	108.522	3.80965	1.09608	0.287712	3.4757
1460179_at	Dnaja1	15502	2	281.188	935.071	270.136	3.32542	0.960694	0.288894	3.46148
1426316_at	6330416G13Rik	230279	2	37.4988	113.619	33.0222	3.02995	0.88062	0.290639	3.4407
1416442_at	Ier2	15936	2	26.3424	114.223	33.2543	4.33609	1.26239	0.291135	3.43483
1418105_at	Stmn4	56471	2	8.88263	40.7013	11.8645	4.58212	1.3357	0.291502	3.4305
1437477_at	Lrrfip1	16978	2	75.8664	351.522	102.522	4.63343	1.35135	0.291651	3.42875
1456321_at	Nipal1	70701	2	11.7551	49.5529	14.5573	4.21544	1.23838	0.293773	3.40399
1428834_at	Dusp4	319520	2	69.6042	389.855	114.566	5.60103	1.64597	0.293869	3.40288
1438562_a_at	Ptpn2	19255	2	65.0986	325.522	96.1885	5.00044	1.47758	0.29549	3.38421
1418349_at	Hbegf	15200	2	51.317	215.522	63.7439	4.19981	1.24216	0.295765	3.38106
1449703_at	Zfand2a	100494	2	209.188	770.939	228.188	3.68538	1.09083	0.295988	3.37852
1456541_x_at	Atad3a	108888	2	62.4043	273.855	81.5244	4.3884	1.30639	0.297692	3.35918
1420287_at	---	---	2	42.486	204.052	60.952	4.8028	1.43464	0.298708	3.34775
1426013_s_at	Plekha4	69217	2	8.88263	28.3744	8.48011	3.19437	0.954685	0.298865	3.34599
1424840_at	Rbks	71336	2	20.7401	96.4344	28.8723	4.64967	1.39211	0.299399	3.34003
1420286_at	---	---	2	29.0633	114.155	34.2293	3.9278	1.17775	0.29985	3.335
1423315_at	Bbc3	170770	2	51.8123	285.188	85.5228	5.50426	1.65063	0.299882	3.33465
1446535_at	---	---	2	33.5597	102.805	30.8479	3.06335	0.919195	0.300062	3.33264
1444426_at	Cass4	320664	2	10.2137	36.6005	11.016	3.58345	1.07854	0.300979	3.32249
1429570_at	Mlkl	74568	2	18.5557	98.1884	29.6386	5.29154	1.59728	0.301855	3.31285
1417707_at	N4bp2l1	100637	2	36.8692	155.855	47.1782	4.22724	1.27961	0.302706	3.30354
1417023_a_at	Fabp4	11770	2	300.101	1034.19	313.227	3.44613	1.04374	0.302873	3.30172
1426645_at	Hsp90aa1	15519	2	1091.86	3366.6	1027.62	3.08338	0.941169	0.305239	3.27612
1424143_a_at	Cdt1	67177	2	48.9218	217.208	66.8924	4.43991	1.36733	0.307964	3.24713
1437493_at	5230400M03Rik	329406	2	19.0567	78.5266	24.1872	4.12068	1.26922	0.308012	3.24663
1426223_at	Ttc39c	72747	2	65.948	299.286	92.1886	4.53821	1.3979	0.308028	3.24645
1416288_at	Dnaja1	15502	2	789.778	2657.86	819.133	3.36532	1.03717	0.308193	3.24472
1419127_at	Npy	109648	2	29.8235	107.635	33.2145	3.60907	1.1137	0.308584	3.24061
1423753_at	Bambi	68010	2	42.523	170.522	52.9465	4.01011	1.24513	0.310497	3.22064
1453590_at	Arl5b	75869	2	10.8828	44.653	13.8906	4.10309	1.27638	0.311079	3.21461
1453119_at	Otud1	71198	2	522.243	2231.36	702.188	4.27264	1.34456	0.314691	3.17772
1449317_at	Cflar /// LOC100040853	100040853 /// 12633	2	17.8433	75.3281	23.7239	4.22165	1.32957	0.314941	3.17519
1455599_at	Gfod1	328232	2	24.3377	93.1886	29.6272	3.82897	1.21734	0.317928	3.14537
1429135_at	1110059M19Rik	68800	2	9.93907	39.1821	12.511	3.94223	1.25877	0.319303	3.13182
1426526_s_at	Ovgp1	12659	2	6.62239	30.3928	9.70451	4.5894	1.46541	0.319303	3.13182
1423903_at	Pvr	52118	2	130.128	575.248	185.355	4.42063	1.42441	0.322218	3.10349
1443349_at	---	---	2	14.1863	55.3038	17.8433	3.89841	1.25779	0.322641	3.09942
1431351_at	Pvt1	19296	2	19.5625	79.0315	25.5792	4.03996	1.30756	0.323658	3.08968
1448318_at	Plin2	11520	2	704.372	2785.44	907.522	3.9545	1.28841	0.32581	3.06928
1431230_a_at	Btbd9 /// LOC100048111	100048111 /// 224671	2	20.3161	65.8991	21.4925	3.24368	1.0579	0.326143	3.06614
1451777_at	Ddx60	234311	2	7.78261	27.9342	9.11305	3.5893	1.17095	0.326233	3.06529
1419759_at	Abcb1a	18671	2	7.74623	26.5499	8.66155	3.42746	1.11816	0.326237	3.06526
1434239_at	Rrp12	107094	2	13.7799	62.9264	20.638	4.56653	1.49769	0.327971	3.04905
1456918_at	Raph1	77300	2	27.146	94.9257	31.1689	3.49686	1.1482	0.328351	3.04553
1438178_x_at	Atad3a	108888	2	41.5878	170.225	55.9923	4.09316	1.34637	0.32893	3.04016
1420509_at	Srfbp1	67222	2	123.514	529.522	174.776	4.28714	1.41503	0.330063	3.02972
1450986_at	Nop58	55989	2	90.1031	394.188	130.576	4.37486	1.44919	0.331253	3.01884
1456738_s_at	Brp16	59053	2	48.3563	201.501	66.8145	4.16701	1.38171	0.331583	3.01583
1434252_at	Tmcc3	319880	2	40.6974	134.483	44.5959	3.30446	1.09579	0.33161	3.01559
1440386_at	Glce	93683	2	16.3691	56.6303	18.814	3.45959	1.14936	0.332225	3.01001
1419698_at	Cxcl11	56066	2	9.48867	28.5404	9.48867	3.00784	1	0.332464	3.00784
1439999_at	---	---	2	21.8985	79.2818	26.5175	3.62042	1.21093	0.334471	2.98979
1429056_at	Narg1l	66897	2	18.975	70.5353	23.7239	3.71727	1.25027	0.336341	2.97317
1443532_at	---	---	2	16.6793	51.3523	17.2995	3.0788	1.03718	0.336879	2.96843
1432394_a_at	Aatf	56321	2	66.6901	261.188	88.1258	3.91645	1.32142	0.337403	2.96381
1447856_x_at	Slc25a25	227731	2	40.5216	158.855	53.781	3.92025	1.32722	0.338554	2.95374
1449227_at	Ch25h	12642	2	332.522	1213.77	411.566	3.6502	1.23771	0.33908	2.94916
1416856_at	3230401D17Rik	66680	2	228.986	906.188	308.188	3.95739	1.34588	0.340093	2.94037
1425075_at	Gatad2b	229542	2	26.3424	117.922	40.1572	4.4765	1.52443	0.340541	2.9365
1439589_at	---	---	2	15.0154	49.9304	17.0043	3.32527	1.13246	0.34056	2.93634
1437497_a_at	Hsp90aa1	15519	2	1007.52	3376.57	1150.08	3.35136	1.1415	0.340607	2.93593
1425305_at	Zfp295	114565	2	28.7665	134.522	46.0208	4.67634	1.59981	0.342107	2.92306
1425536_at	Stx3	20908	2	118.606	512.82	175.522	4.32373	1.47987	0.342267	2.92169
1420450_at	Mmp10	17384	2	25.8813	107.522	36.8877	4.15442	1.42526	0.343072	2.91484
1448171_at	Siah2	20439	2	9.24085	42.3432	14.5573	4.58217	1.57532	0.343793	2.90872
1416345_at	Timm8a1	30058	2	196.695	845.807	292.522	4.30009	1.48718	0.345849	2.89143
1435904_at	Eif2c3	214150	2	41.6132	166.402	57.6721	3.99877	1.38591	0.346583	2.88531
1431909_at	Zc3hav1	78781	2	12.0037	44.3335	15.3812	3.69332	1.28138	0.346944	2.88231
1425364_a_at	Slc3a2	17254	2	634.855	2655.04	929.182	4.18213	1.46361	0.349969	2.8574
1447504_at	---	---	2	12.6178	41.5878	14.5573	3.29596	1.15371	0.350038	2.85683
1419561_at	Ccl3	20302	2	313.497	1429.52	500.891	4.55992	1.59775	0.35039	2.85396
1418936_at	Maff	17133	2	37.7774	126.37	44.305	3.34513	1.17279	0.350596	2.85228
1421134_at	Areg	11839	2	7.12805	23.3517	8.18768	3.27602	1.14866	0.350625	2.85205
1434559_at	Stx3	20908	2	21.4869	69.2149	24.4463	3.22126	1.13773	0.353194	2.83131
1442201_at	---	---	2	7.66942	25.8019	9.11305	3.36425	1.18823	0.353194	2.83131
1445781_at	---	---	2	17.419	58.0005	20.5846	3.32972	1.18173	0.354903	2.81767
1419417_at	Vegfc	22341	2	41.5878	172.888	61.442	4.15719	1.4774	0.355386	2.81385
1453234_at	1300002K09Rik	74152	2	11.1967	35.0406	12.4616	3.12955	1.11297	0.355633	2.81189
1452171_at	Grwd1	101612	2	27.2474	92.1886	32.9081	3.38339	1.20775	0.356965	2.80139
1439114_at	Ddx60	234311	2	7.75671	27.3393	9.76744	3.5246	1.25923	0.357267	2.79902
1449755_at	D7Ertd183e	52234	2	15.8673	49.884	17.8433	3.14381	1.12453	0.357696	2.79567
1451263_a_at	Fabp4	11770	2	432.188	1366.29	492.798	3.16133	1.14024	0.360684	2.77251
1454992_at	Slc7a1	11987	2	240.708	1022.52	370.191	4.24797	1.53792	0.362037	2.76215
1425993_a_at	Hsph1	15505	2	2224.44	7833.58	2837.19	3.52159	1.27546	0.362183	2.76103
1420413_at	Slc7a11	26570	2	10.2137	43.0984	15.6126	4.21965	1.52859	0.362254	2.76049
1429338_a_at	Nol9	74035	2	13.945	46.3885	16.8864	3.32654	1.21093	0.36402	2.7471
1424356_a_at	Metrnl	210029	2	145.153	512.855	187.072	3.53321	1.28879	0.364765	2.74149
1459718_x_at	Klf6	23849	2	42.486	139.534	50.9055	3.28424	1.19817	0.364824	2.74105
1433733_a_at	Cry1	12952	2	124.855	387.627	141.522	3.10462	1.13349	0.365098	2.73899
1419111_at	Ing2	69260	2	40.6974	127.956	47.1475	3.14407	1.15849	0.368468	2.71394
1418572_x_at	Tnfrsf12a	27279	2	155.855	534.757	197.669	3.43112	1.26829	0.369643	2.70531
1434399_at	Galnt6 /// LOC100047499	100047499 /// 207839	2	37.6562	115.522	42.7606	3.0678	1.13555	0.370152	2.70159
1417096_at	Rrp15	67223	2	31.9555	104.87	38.9416	3.28176	1.21862	0.371331	2.69302
1418571_at	Tnfrsf12a	27279	2	231.774	890.855	331.635	3.84364	1.43085	0.372266	2.68625
1449010_at	Hspa4l	18415	2	48.3563	158.756	59.1852	3.28305	1.22394	0.372805	2.68237
1419529_at	Il23a	83430	2	6.00131	19.0316	7.10396	3.17125	1.18374	0.373271	2.67902
1425357_a_at	Grem1	23892	2	110.522	340.543	127.317	3.08123	1.15197	0.373866	2.67476
1450779_at	Fabp7	12140	2	9.54704	36.594	13.6882	3.83302	1.43377	0.374057	2.67339
1453757_at	Herc5	67138	2	8.66155	28.0212	10.494	3.23513	1.21156	0.374501	2.67022
1448694_at	Jun	16476	2	781.242	2642.19	989.792	3.38204	1.26695	0.374611	2.66944
1440192_at	Ttc39b	69863	2	23.7239	79.4801	29.7752	3.35021	1.25507	0.374624	2.66934
1415712_at	Zranb1	360216	2	270.753	848.522	319.522	3.13393	1.18012	0.376563	2.6556
1453504_at	Taf15	70439	2	66.7066	257.451	97.1884	3.85945	1.45695	0.377503	2.64898
1442798_x_at	Hk3	212032	2	21.8195	71.6629	27.2443	3.28435	1.24862	0.380174	2.63038
1444350_at	Slfn10	237887	2	7.86665	26.8391	10.2137	3.41176	1.29836	0.380554	2.62775
1459981_s_at	LOC100045795 /// Rsbn1	100045795 /// 229675	2	465.741	1702.36	648.188	3.65517	1.39174	0.380758	2.62634
1430134_a_at	Yars2	70120	2	35.2043	130.536	49.9497	3.70797	1.41885	0.38265	2.61336
1460399_at	Ccdc117	104479	2	26.3424	96.1117	36.8877	3.64856	1.40032	0.3838	2.60552
1459668_at	---	---	2	15.3812	51.2363	19.8011	3.33109	1.28735	0.386466	2.58755
1424333_at	Rg9mtd1	52575	2	50.2498	184.284	71.2397	3.66736	1.41771	0.386575	2.58682
1452414_s_at	Ccdc86	108673	2	65.8991	198.959	77.1011	3.01914	1.16999	0.387523	2.58049
1438130_at	Taf15	70439	2	83.6174	305.439	118.522	3.65282	1.41743	0.388037	2.57707
1455680_at	9630025H16Rik	319878	2	36.0412	109.483	42.6447	3.03771	1.18322	0.389511	2.56732
1426625_at	Zfp623	78834	2	68.2199	211.851	82.5239	3.10541	1.20967	0.389537	2.56715
1424841_s_at	Rbks	71336	2	17.419	67.1276	26.2706	3.8537	1.50816	0.391353	2.55524
1450970_at	Got1	14718	2	125.855	474.684	186.188	3.77167	1.47939	0.392236	2.54948
1423555_a_at	Ifi44	99899	2	9.11305	34.8775	13.6862	3.8272	1.50182	0.392407	2.54838
1418872_at	Abcb1b	18669	2	27.3657	103.188	40.5699	3.77072	1.48251	0.393163	2.54347
1448272_at	Btg2	12227	2	124.833	447.188	175.863	3.58229	1.40878	0.393263	2.54283
1416129_at	Errfi1	74155	2	681.032	2212.36	870.227	3.24853	1.27781	0.393349	2.54227
1448795_a_at	LOC100046166 /// Tbrg4	100046166 /// 21379	2	24.4049	80.1034	31.5104	3.28226	1.29115	0.393371	2.54213
1435174_at	LOC100045795 /// Rsbn1	100045795 /// 229675	2	153.855	492.522	193.855	3.20121	1.25998	0.393597	2.54067
1427564_at	Diap2	54004	2	74.273	245.974	97.1884	3.31176	1.30853	0.395117	2.5309
1458980_at	---	---	2	10.8828	35.5847	14.0681	3.26982	1.29269	0.39534	2.52947
1453044_at	C030014I23Rik	77381	2	33.4715	105.045	41.5878	3.13833	1.24248	0.395905	2.52586
1436164_at	Slc30a1	22782	2	131.211	398.188	157.87	3.03472	1.20318	0.396471	2.52225
1452218_at	Ccdc117	104479	2	19.1305	63.916	25.4088	3.34104	1.32818	0.397535	2.5155
1456879_at	C130022K22Rik	232236	2	32.7525	102.656	40.8956	3.1343	1.24862	0.398375	2.5102
1425139_at	Sesn2	230784	2	80.525	269.855	107.522	3.3512	1.33526	0.398442	2.50977
1424861_at	D930016D06Rik	100662	2	73.2013	246.529	98.2395	3.36783	1.34205	0.39849	2.50947
1435574_at	---	---	2	20.7092	66.8924	26.8669	3.23007	1.29734	0.401644	2.48976
1444432_at	D330040H18Rik	320847	2	29.3353	100.188	40.3465	3.41529	1.37536	0.402706	2.4832
1427364_a_at	Odc1	18263	2	21.8985	78.1516	31.516	3.56881	1.43918	0.403267	2.47975
1451998_at	Tasp1	75812	2	11.4387	34.377	13.8667	3.00534	1.21227	0.403372	2.4791
1432826_a_at	Cd80	12519	2	29.9428	93.1886	37.7435	3.11222	1.26052	0.405023	2.469
1434424_at	Mfsd7b	226844	2	206.249	710.659	288.522	3.44563	1.3989	0.405992	2.4631
1435490_at	Hk3	212032	2	31.1689	103.436	42.3257	3.31857	1.35794	0.409195	2.44382
1434744_at	Yrdc	230734	2	53.7671	169.522	69.4026	3.15289	1.2908	0.409402	2.44259
1418829_a_at	Eno2	13807	2	187.252	571.201	233.855	3.05044	1.24888	0.409409	2.44254
1436026_at	Zfp703	353310	2	137.161	414.03	169.522	3.01858	1.23594	0.409443	2.44234
1426609_at	Dis3	72662	2	85.9509	304.855	125.522	3.54685	1.46039	0.411742	2.4287
1426875_s_at	Srxn1	76650	2	299.524	1076.52	444.522	3.59411	1.4841	0.412924	2.42175
1427091_at	Znfx1	98999	2	19.938	70.2106	29.0645	3.52145	1.45775	0.413962	2.41568
1420057_at	Jmjd6	107817	2	99.8551	304.842	126.611	3.05284	1.26795	0.415335	2.4077
1434660_at	Alkbh1	211064	2	27.7585	95.1885	39.6821	3.42916	1.42955	0.416879	2.39878
1430886_at	1700112E06Rik	76633	2	48.3563	155.427	65.0035	3.21421	1.34426	0.418225	2.39106
1449746_s_at	Glipr1	73690	2	110.163	332.855	139.522	3.02146	1.2665	0.419167	2.38569
1426533_at	Nop56	67134	2	245.322	814.188	341.808	3.31886	1.3933	0.419815	2.382
1460691_at	Zfp598	213753	2	58.7558	183.188	77.1944	3.11779	1.31382	0.421393	2.37308
1417016_at	Mapkapk5	17165	2	206.188	686.5	291.288	3.32948	1.41273	0.424309	2.35678
1438796_at	Nr4a3	18124	2	31.0408	101.762	43.3919	3.27832	1.3979	0.426407	2.34518
1443504_at	E330022O07	330804	2	25.8019	78.6012	33.634	3.04634	1.30355	0.427908	2.33695
1423064_at	Dnmt3a	13435	2	121.763	385.205	164.855	3.16356	1.3539	0.427967	2.33663
1416690_at	Gtpbp2	56055	2	103.855	342.756	147.104	3.30033	1.41644	0.429181	2.33002
1425686_at	Cflar	12633	2	257.522	802.147	344.733	3.11487	1.33866	0.429763	2.32686
1429080_at	Mphosph10	67973	2	118.525	363.097	157.855	3.06345	1.33182	0.434746	2.30019
1447863_s_at	Nr4a2	18227	2	27.2181	91.4852	39.8153	3.36118	1.46282	0.43521	2.29774
1435484_at	Slc5a3	53881	2	543.984	1701.88	741.855	3.12856	1.36375	0.435902	2.29409
1451564_at	Parp14	547253	2	57.8224	187.522	81.7672	3.24306	1.41411	0.436041	2.29336
1454197_a_at	Ccdc86	108673	2	87.6175	289.522	126.777	3.30438	1.44694	0.437886	2.2837
1444399_at	---	---	2	8.75619	27.0148	11.8645	3.08523	1.35499	0.439186	2.27694
1420992_at	Ankrd1	107765	2	211.513	669.711	296.522	3.16628	1.40191	0.442761	2.25855
1429769_at	Pggt1b	225467	2	214.188	653.207	290.852	3.04969	1.35793	0.445267	2.24584
1416998_at	Rrs1	59014	2	187.608	573.425	260.188	3.0565	1.38687	0.453745	2.20388
1416940_at	Ppif	105675	2	23.2055	70.2106	31.9255	3.0256	1.37577	0.45471	2.1992
1420512_at	Dkk2	56811	3	66.9023	20.638	15.2661	0.30848	0.228185	0.739708	1.35189
1427056_at	Adamts15	235130	3	65.8669	12.4122	10.5001	0.188444	0.159415	0.845953	1.1821
1450988_at	Lgr5	14160	3	36.2771	10.5001	11.8645	0.289443	0.327053	1.12994	0.885003
1418063_at	Kera	16545	3	29.6025	7.5278	8.62066	0.254296	0.291214	1.14518	0.873227
1421916_at	Pdgfra	18595	3	35.6796	10.3982	12.2193	0.291432	0.342473	1.17514	0.850966
1451440_at	Chodl	246048	3	34.2574	6.27442	7.42887	0.183155	0.216854	1.18399	0.8446
1416676_at	Kng1	16644	3	41.1585	8.55331	10.8828	0.207814	0.264411	1.27235	0.785949
1460049_s_at	1500015O10Rik	78896	3	56.3158	10.8454	14.1149	0.192581	0.250639	1.30147	0.768361
1427293_a_at	Auts2	319974	3	35.892	8.18768	10.6565	0.22812	0.296904	1.30153	0.768329
1448301_s_at	Serpinb1a	66222	3	57.4429	7.98276	10.5001	0.138969	0.182793	1.31535	0.760253
1416225_at	Adh1	11522	3	43.5951	11.559	15.3812	0.265145	0.35282	1.33067	0.7515
1451486_at	Slc46a3	71706	3	76.1957	23.3353	31.1689	0.306254	0.409064	1.3357	0.748671
1416371_at	Apod	11815	3	28.3138	8.66155	11.8645	0.305913	0.419037	1.36979	0.730038
1427919_at	Srpx2	68792	3	34.377	11.2322	15.4686	0.326735	0.449968	1.37717	0.726128
1438602_s_at	Masp1	17174	3	32.9064	10.5338	14.5573	0.320115	0.442384	1.38195	0.723613
1418450_at	Islr	26968	3	30.5901	9.35327	13.166	0.305761	0.430401	1.40764	0.71041
1448251_at	9030425E11Rik	71566	3	51.7953	17.0253	24.1025	0.328704	0.465342	1.41569	0.70637
1416194_at	Cyp4b1	13120	3	28.2833	9.11305	12.9813	0.322206	0.458974	1.42447	0.702014
1441506_at	Dcn	13179	3	45.2388	14.2935	20.638	0.315956	0.456201	1.44388	0.69258
1416321_s_at	Prelp	116847	3	34.377	6.98514	10.2639	0.203192	0.298567	1.46938	0.680558
1448649_at	Enpep	13809	3	36.0412	11.7443	17.5036	0.325858	0.485655	1.49039	0.670965
1417645_at	Sspn	16651	3	31.8206	9.93907	14.8331	0.312347	0.466146	1.4924	0.670062
1448727_at	Tle6	114606	3	42.486	12.7637	19.0836	0.300422	0.449174	1.49514	0.668833
1417732_at	Anxa8	11752	3	67.5548	12.6475	18.975	0.187219	0.280884	1.5003	0.666535
1435603_at	Sned1	208777	3	72.0169	12.6901	19.0403	0.17621	0.264387	1.50041	0.666486
1419906_at	Hpgd	15446	3	670.522	214.926	325.273	0.320535	0.485105	1.51342	0.660754
1423261_at	1500015O10Rik	78896	3	68.2392	9.11305	13.9506	0.133546	0.204436	1.53083	0.653239
1438680_at	Auts2	319974	3	191.624	63.2268	97.1884	0.329953	0.507184	1.53714	0.650559
1431804_a_at	Sp3	20687	3	37.5056	9.11305	14.0645	0.242979	0.374998	1.54334	0.647947
1437685_x_at	Fmod	14264	3	45.8655	14.1733	21.8985	0.309019	0.477451	1.54505	0.647226
1434051_s_at	Hspa12a	73442	3	31.4957	9.35327	14.5573	0.29697	0.462199	1.55638	0.642515
1421034_a_at	Il4ra	16190	3	316.188	103.372	161.855	0.326933	0.511894	1.56575	0.638673
1452353_at	Gpr155	68526	3	65.3579	13.1339	20.638	0.200954	0.315769	1.57135	0.636394
1416732_at	Top2b	21974	3	57.4595	15.1382	24.1245	0.263459	0.419853	1.59362	0.627502
1427054_s_at	Abi3bp	320712	3	50.8506	9.03413	14.5573	0.17766	0.286276	1.61137	0.620591
1455748_at	LOC100040563 /// Tmem181a	100040563 /// 77106	3	64.907	20.7652	33.4801	0.319923	0.515818	1.61232	0.620225
1434539_at	Lrrn3	16981	3	45.2812	7.70358	12.5885	0.170128	0.278007	1.63411	0.611955
1453418_at	Col24a1	71355	3	31.9555	8.37657	13.6882	0.262132	0.428352	1.63411	0.611955
1422010_at	Tlr7	170743	3	221.522	57.9448	95.4728	0.261576	0.430986	1.64765	0.606925
1430554_at	Lrig3	320398	3	78.1052	25.8019	42.63	0.330348	0.545802	1.65221	0.605252
1433691_at	Ppp1r3c	53412	3	52.1012	11.1967	18.5032	0.214903	0.35514	1.65256	0.605122
1433827_at	Atp8a1	11980	3	91.2508	29.8399	49.9497	0.32701	0.547389	1.67392	0.597399
1434776_at	Sema5a	20356	3	44.3392	11.8659	20.0275	0.267616	0.451688	1.68783	0.592478
1417649_at	Cdkn1c	12577	3	45.6687	10.2484	17.2995	0.224408	0.378804	1.68801	0.592412
1422542_at	Gpr34	23890	3	159.855	18.2752	30.9711	0.114324	0.193745	1.6947	0.590075
1451912_a_at	Fgfrl1 /// LOC100046239	100046239 /// 116701	3	46.2777	14.391	24.4049	0.31097	0.527359	1.69585	0.589675
1417788_at	Sncg	20618	3	40.6974	11.9288	20.2367	0.293111	0.497247	1.69645	0.589467
1451241_at	Lamb1-1	16777	3	181.018	52.8168	89.6289	0.291778	0.495139	1.69698	0.589284
1426673_at	Cdh3	12560	3	40.4258	11.8645	20.1577	0.293489	0.498634	1.69899	0.588585
1448288_at	Nfib	18028	3	38.1584	10.7987	18.4019	0.282997	0.48225	1.70408	0.586827
1448024_at	Npr3	18162	3	34.2578	9.11305	15.5371	0.266014	0.453535	1.70493	0.586535
1425789_s_at	Anxa8	11752	3	51.8567	8.98895	15.3812	0.173342	0.296611	1.71113	0.584409
1446377_at	Fbln5	23876	3	26.1736	8.71405	14.9109	0.332933	0.569691	1.71113	0.584409
1419905_s_at	Hpgd	15446	3	679.493	188.373	323.522	0.277226	0.476122	1.71745	0.582258
1437422_at	Sema5a	20356	3	37.5424	12.3658	21.2618	0.329381	0.566341	1.71941	0.581595
1434151_at	Mettl7a1	70152	3	132.522	43.6183	75.5034	0.329141	0.569744	1.731	0.5777
1460700_at	Stat3	20848	3	230.31	76.1957	132.255	0.330839	0.574245	1.73572	0.576128
1430427_a_at	Pcdh18	73173	3	22.5479	7.40514	12.881	0.328418	0.571274	1.73947	0.574887
1430313_at	Adamtsl1	77739	3	29.6843	7.35884	12.8571	0.247904	0.433128	1.74716	0.572356
1423967_at	Palm	18483	3	84.6907	27.5752	48.2367	0.3256	0.569564	1.74928	0.571665
1417009_at	C1r	50909	3	33.661	8.78882	15.3812	0.261098	0.456945	1.75009	0.571399
1419309_at	Pdpn	14726	3	766.855	215.129	379.003	0.280534	0.49423	1.76175	0.567618
1418440_at	Col8a1	12837	3	141.014	46.7945	82.6066	0.331843	0.585804	1.76531	0.566474
1455978_a_at	Matn2	17181	3	96.0016	28.5747	50.9009	0.297649	0.530208	1.78132	0.56138
1423294_at	Mest	17294	3	48.3642	13.6882	24.4049	0.283024	0.504607	1.78292	0.560879
1429348_at	Sema3c	20348	3	380.855	126.188	227.188	0.331329	0.596522	1.80039	0.555435
1433804_at	Jak1	16451	3	103.94	25.9222	46.7945	0.249396	0.450207	1.80519	0.553958
1428430_at	Rgmb	68799	3	62.1955	15.3819	27.7968	0.247314	0.446925	1.80711	0.553369
1434957_at	Cdon	57810	3	37.4603	12.2193	22.1163	0.326193	0.590393	1.80995	0.552502
1434123_at	Fut11	73068	3	86.7034	25.3835	46.1515	0.292762	0.532292	1.81817	0.550003
1451550_at	Ephb3	13845	3	46.3704	10.7445	19.5625	0.23171	0.421874	1.8207	0.549241
1435385_at	Tshz2	228911	3	32.5777	7.04013	12.8336	0.216103	0.393938	1.82292	0.548571
1421047_at	LOC100046891 /// Smad5	100046891 /// 17129	3	119.653	39.8153	72.7159	0.332755	0.607721	1.82633	0.547545
1421313_s_at	Cttn	13043	3	95.1885	20.5592	37.7435	0.215984	0.396513	1.83585	0.544708
1434150_a_at	Higd1c /// Mettl7a1 /// Mettl7a2	380975 /// 393082 /// 70152	3	81.5244	21.9007	40.4995	0.26864	0.496778	1.84923	0.540765
1435312_at	Paqr7	71904	3	44.9382	11.1967	20.7473	0.249158	0.461686	1.85299	0.539669
1452872_at	Ank3	11735	3	39.8535	12.6901	23.5146	0.318419	0.590026	1.85299	0.539669
1448407_at	4632428N05Rik	74048	3	76.1957	23.8519	44.4904	0.313034	0.583897	1.86528	0.536112
1420894_at	Tgfbr1	21812	3	25.0976	8.24604	15.3812	0.328558	0.612857	1.86529	0.53611
1456602_at	4932417I16Rik	234740	3	76.6121	23.7239	44.3668	0.309663	0.57911	1.87013	0.534722
1447602_x_at	Sulf2	72043	3	1088.21	335.855	628.862	0.308631	0.577888	1.87242	0.534068
1436399_s_at	Nrk	27206	3	63.916	13.4024	25.0976	0.209688	0.392666	1.87262	0.534011
1416623_at	Thbs3	21827	3	49.0236	12.0026	22.5479	0.244833	0.45994	1.87858	0.532316
1452346_at	B3gnt1	108902	3	132.522	43.2039	81.232	0.326014	0.612972	1.8802	0.531858
1459211_at	Gli2	14633	3	37.4988	10.5338	19.9509	0.28091	0.532041	1.89399	0.527985
1443952_at	---	---	3	23.1716	6.98684	13.277	0.301526	0.572985	1.90029	0.526237
1422890_at	Pcdh18	73173	3	62.3669	13.5251	25.8019	0.216863	0.413711	1.90771	0.52419
1423915_at	Olfml2b	320078	3	39.5023	10.2137	19.5625	0.258561	0.495224	1.91531	0.52211
1457637_at	---	---	3	78.3205	21.2478	40.6974	0.271293	0.519627	1.91537	0.522092
1445421_at	---	---	3	62.5507	18.4019	35.2575	0.294192	0.563664	1.91597	0.521928
1431079_at	C1qtnf2	69183	3	54.9868	11.0849	21.2618	0.201592	0.386671	1.91809	0.521352
1435275_at	Cox6b2	333182	3	94.7352	30.3928	58.3947	0.320818	0.616399	1.92133	0.520472
1450625_at	Col5a2	12832	3	839.522	256.331	495.287	0.305329	0.589963	1.93222	0.51754
1427050_at	Txndc16	70561	3	80.9936	23.3684	45.225	0.288521	0.558377	1.93531	0.516714
1424808_at	Lama4	16775	3	54.7489	8.19093	15.8541	0.149609	0.289579	1.93557	0.516643
1455720_at	Adamts2	216725	3	37.8285	8.88263	17.2079	0.234813	0.454891	1.93725	0.516196
1448901_at	Cpxm1	56264	3	80.4587	14.3035	27.7968	0.177775	0.345479	1.94335	0.514575
1423836_at	Zfp503	218820	3	123.352	37.221	72.4186	0.301747	0.58709	1.94564	0.51397
1426782_at	Gpr125	70693	3	156.809	45.5583	89.0595	0.290534	0.56795	1.95485	0.511549
1443646_at	Igsf10	242050	3	31.2616	9.35327	18.4095	0.299194	0.588885	1.96824	0.508068
1417753_at	Pkd2	18764	3	1206.97	379.351	749.522	0.314302	0.620997	1.9758	0.506125
1451507_at	Mef2c	17260	3	55.7203	15.3664	30.4742	0.275777	0.546915	1.98318	0.504241
1452031_at	Slc1a3	20512	3	34.181	6.67802	13.277	0.195372	0.388432	1.98816	0.502977
1440617_at	Cpa6	329093	3	81.5244	22.0519	43.9387	0.270494	0.538965	1.99252	0.501877
1423284_at	Mansc1	67729	3	57.5723	16.8272	33.5597	0.292279	0.582914	1.99438	0.501409
1421101_a_at	Ldb2	16826	3	62.9264	18.8868	37.7902	0.300142	0.600546	2.00088	0.499781
1454699_at	LOC100047324 /// Sesn1	100047324 /// 140742	3	134.522	40.6189	81.3675	0.30195	0.604865	2.00319	0.499203
1416619_at	4632428N05Rik	74048	3	200.188	62.1192	124.522	0.310304	0.622023	2.00456	0.498863
1418057_at	Tiam1	21844	3	58.3245	15.1382	30.3928	0.259551	0.521097	2.00769	0.498085
1460735_at	Svil	225115	3	162.618	42.486	85.5228	0.261262	0.525911	2.01296	0.49678
1434141_at	Gucy1a3	60596	3	55.4891	11.3971	23.0548	0.205394	0.415483	2.02286	0.49435
1436088_at	Fam49b	223601	3	38.8875	10.8146	21.8985	0.278099	0.563124	2.0249	0.49385
1460295_s_at	Il6st	16195	3	51.8567	12.0072	24.3163	0.231545	0.468914	2.02515	0.49379
1439529_at	A430110N23Rik	269855	3	84.5231	16.0931	32.6994	0.190399	0.38687	2.03189	0.492153
1435469_at	Qsox2	227638	3	131.522	36.4933	74.1991	0.27747	0.564159	2.03323	0.491829
1425491_at	Bmpr1a	12166	3	93.0831	26.8477	54.7489	0.288427	0.588173	2.03924	0.490378
1427894_at	Vasn	246154	3	165.936	38.0768	78.1933	0.229467	0.471227	2.05357	0.486957
1424826_s_at	Mtss1	211401	3	314.116	60.5916	124.522	0.192896	0.39642	2.0551	0.486595
1458997_at	Iglon5	210094	3	165.574	37.5039	77.1944	0.226508	0.466223	2.0583	0.485837
1425133_s_at	Rab3il1	74760	3	149.608	41.537	85.5228	0.277639	0.571646	2.05896	0.485683
1427020_at	Scara3	219151	3	40.173	7.94718	16.3691	0.197824	0.407465	2.05974	0.485499
1437081_at	Timp2	21858	3	59.9676	8.5162	17.7459	0.142013	0.295925	2.08378	0.479896
1439015_at	Gfra1	14585	3	112.595	22.4565	46.7945	0.199444	0.415598	2.08378	0.479896
1423607_at	Lum	17022	3	83.4343	10.1723	21.2618	0.12192	0.254833	2.09017	0.47843
1434557_at	Hip1	215114	3	155.362	44.5405	93.1886	0.286688	0.599815	2.09222	0.477961
1428791_at	Ube2h	22214	3	187.855	52.1898	109.673	0.277819	0.583818	2.10143	0.475866
1415806_at	Plat	18791	3	320.522	83.5234	175.522	0.260586	0.547613	2.10147	0.475858
1417251_at	Palmd	114301	3	35.773	7.99661	16.8864	0.223538	0.472043	2.11169	0.473554
1454037_a_at	Flt1	14254	3	56.3262	15.8673	33.5597	0.281704	0.59581	2.11502	0.472809
1425985_s_at	Masp1	17174	3	41.175	11.5238	24.3731	0.279873	0.591938	2.11502	0.472809
1456131_x_at	Dag1	13138	3	126.855	35.8333	76.1957	0.282475	0.600652	2.12639	0.47028
1447839_x_at	Adm	11535	3	1594.52	432.033	919.997	0.270948	0.576974	2.12946	0.469602
1452249_at	Prickle1	106042	3	856.522	211.158	454.855	0.246529	0.531049	2.1541	0.464231
1455143_at	Nlgn2	216856	3	223.888	59.9676	129.522	0.267846	0.578511	2.15986	0.462993
1427274_at	Rnf214	235315	3	96.8308	24.7009	53.781	0.255093	0.555412	2.17729	0.459286
1423493_a_at	Nfix	18032	3	247.772	58.0936	126.522	0.234464	0.510638	2.17789	0.459159
1421002_at	Angptl2	26360	3	67.7879	7.5278	16.4256	0.111049	0.242308	2.18199	0.458298
1456442_at	Rab3il1	74760	3	53.8861	11.7425	25.8019	0.217913	0.478822	2.19731	0.455102
1455582_at	---	---	3	36.6482	7.20904	15.8913	0.196709	0.433618	2.20436	0.453646
1424010_at	Mfap4	76293	3	266.855	49.1827	108.522	0.184305	0.406669	2.2065	0.453206
1460187_at	Sfrp1	20377	3	64.907	7.39375	16.3691	0.113913	0.252193	2.21391	0.45169
1435606_at	Gal3st4	330217	3	69.1316	8.88263	19.7586	0.128489	0.285811	2.22441	0.449557
1430526_a_at	Smarca2	67155	3	277.418	68.2199	151.855	0.24591	0.547388	2.22596	0.449244
1452264_at	Tenc1	209039	3	47.287	12.2193	27.2443	0.258407	0.576149	2.22962	0.448508
1417092_at	Pth1r	19228	3	113.522	23.799	53.6311	0.209643	0.47243	2.2535	0.443755
1452864_at	Med12l	329650	3	245.007	53.781	121.522	0.219509	0.495994	2.25956	0.442563
1421425_a_at	Rcan2	53901	3	207.188	52.4153	118.493	0.252984	0.571909	2.26066	0.44235
1440147_at	Lgi2	246316	3	74.3491	14.4195	32.7525	0.193943	0.440523	2.27141	0.440255
1455208_at	Pex19	19298	3	74.6112	17.8903	40.6974	0.239781	0.54546	2.27483	0.439594
1457139_at	Auts2	319974	3	365.855	74.0983	168.943	0.202534	0.461775	2.27998	0.4386
1454822_x_at	Apcdd1	494504	3	40.6974	9.42331	21.7152	0.231546	0.533578	2.30442	0.433949
1423433_at	Trove2	20822	3	43.4039	9.93907	22.9814	0.22899	0.529478	2.31223	0.432483
1418674_at	Osmr	18414	3	889.234	211.081	489.522	0.237375	0.550498	2.31911	0.431199
1430388_a_at	Sulf2	72043	3	352.089	75.1972	174.523	0.213575	0.49568	2.32088	0.430872
1424420_at	Ccpg1	72278	3	219.39	50.6235	119.522	0.230747	0.544792	2.36099	0.423551
1433735_a_at	Tmem64	100201	3	483.855	111.176	264.848	0.229771	0.54737	2.38225	0.419772
1426867_at	Dmrt2	226049	3	44.0247	8.20716	19.5625	0.186422	0.444352	2.38358	0.419536
1419100_at	Serpina3n	20716	3	143.855	17.048	40.7407	0.118508	0.283207	2.38977	0.41845
1418445_at	Slc16a2	20502	3	58.8734	9.60374	23.0548	0.163125	0.3916	2.40061	0.416561
1416594_at	Sfrp1	20377	3	61.9384	8.39645	20.1693	0.135561	0.325635	2.40212	0.416298
1451047_at	Itm2a	16431	3	67.5548	12.2503	29.5316	0.181338	0.437151	2.4107	0.414818
1421365_at	Fst	14313	3	114.522	18.6136	45.0502	0.162534	0.393377	2.42028	0.413176
1421074_at	Cyp7b1	13123	3	57.7749	11.811	28.8723	0.204432	0.499738	2.44453	0.409077
1436293_x_at	Ildr2	100039795	3	124.631	27.5752	67.7128	0.221255	0.543306	2.45556	0.407238
1418675_at	Osmr	18414	3	49.4694	7.70358	19.1009	0.155724	0.386115	2.47948	0.403311
1419358_at	Sorcs2	81840	3	307.188	61.7334	153.165	0.200963	0.498603	2.48107	0.403051
1438620_x_at	Sfrp1	20377	3	90.5669	11.1967	27.7968	0.123629	0.30692	2.48259	0.402806
1449368_at	Dcn	13179	3	1845.86	286.546	715.855	0.155237	0.387818	2.49822	0.400284
1441389_at	---	---	3	58.3245	12.0958	30.3928	0.207387	0.521097	2.51268	0.397982
1434470_at	Syt13	80976	3	182.855	16.7894	42.486	0.0918183	0.232348	2.53052	0.395175
1420924_at	Timp2	21858	3	47.1748	9.87804	25.0976	0.209392	0.532014	2.54075	0.393585
1423872_a_at	Dag1	13138	3	83.5806	15.613	39.8153	0.186801	0.47637	2.55014	0.392136
1437197_at	Sorbs2	234214	3	69.9449	11.9891	31.1689	0.171408	0.445621	2.59976	0.38465
1460694_s_at	Svil	225115	3	454.522	89.8849	234.169	0.197757	0.515199	2.60521	0.383846
1421571_a_at	LOC100045833 /// Ly6c1 /// Ly6c2	100041546 /// 100045833 /// 17067	3	265.188	34.7835	90.8839	0.131165	0.342715	2.61285	0.382724
1423608_at	Itm2a	16431	3	170.327	32.2178	84.5231	0.189152	0.496239	2.62349	0.381172
1448725_at	Parg	26430	3	355.934	68.2199	180.522	0.191665	0.507178	2.64617	0.377904
1435285_at	Mpped2	77015	3	64.907	12.1101	32.1326	0.186576	0.495057	2.65337	0.376879
1418441_at	Col8a1	12837	3	161.915	28.4041	76.1957	0.175427	0.470592	2.68256	0.372779
1456322_at	Gas1	14451	3	91.1207	11.3779	31.1689	0.124867	0.342062	2.73942	0.365041
1452432_at	Tfpi	21788	3	102.855	15.0982	42.0258	0.146791	0.408592	2.78349	0.359261
1448469_at	Nid1	18073	3	145.643	21.8085	61.9384	0.149739	0.425275	2.8401	0.3521
1427391_a_at	Col12a1	12816	3	178.855	24.107	68.9142	0.134785	0.385308	2.85868	0.349812
1419088_at	Timp3	21859	3	108.343	17.5622	50.9009	0.162099	0.469813	2.89831	0.345028
1434307_at	Tmem64	100201	3	245.855	40.8905	118.562	0.166319	0.482244	2.8995	0.344887
1436868_at	Rtn4rl1	237847	3	167.522	11.5238	33.5597	0.0687899	0.200331	2.91221	0.343382
1417852_x_at	Clca1	12722	3	137.942	13.277	39.1553	0.0962503	0.283852	2.94911	0.339086
1449303_at	Sesn3	75747	3	138.029	17.3964	51.8567	0.126035	0.375695	2.98089	0.335471
1416686_at	Plod2	26432	3	426.188	65.8991	199.188	0.154624	0.467372	3.02263	0.330838
1424041_s_at	C1s /// LOC100044326	100044326 /// 50908	3	92.3147	11.3639	34.377	0.1231	0.37239	3.02511	0.330567
1433855_at	Abat	268860	3	126.085	18.5109	57.6721	0.146813	0.457407	3.11557	0.320969
1428948_at	5730414M22Rik	70528	3	86.0591	10.5001	32.8193	0.122011	0.381358	3.12561	0.319938
1421075_s_at	Cyp7b1	13123	3	102.855	13.4964	42.486	0.131217	0.413067	3.14796	0.317666
1451119_a_at	Fbln1	14114	3	128.442	13.5266	43.3919	0.105313	0.337833	3.2079	0.31173
1435990_at	Adamts2	216725	3	227.188	30.4253	98.0306	0.133921	0.431495	3.22201	0.310366
1433795_at	Tgfbr3	21814	3	810.335	79.3735	257.522	0.0979515	0.317797	3.24443	0.308221
1420772_a_at	Tsc22d3	14605	3	92.1886	12.3596	40.1251	0.134068	0.435251	3.24648	0.308026
1422540_at	Fbln1	14114	3	199.178	21.2618	72.1084	0.106748	0.362031	3.39146	0.294859
1416077_at	Adm	11535	3	175.93	21.723	74.1991	0.123475	0.421753	3.41569	0.292766
1448194_a_at	H19	14955	3	2231.52	254.163	881.966	0.113897	0.395231	3.47008	0.288178
1416318_at	Serpinb1a	66222	3	136.031	6.48211	22.616	0.0476517	0.166256	3.48898	0.286617
1452365_at	Csgalnact1	234356	3	387.204	34.377	128.832	0.0887827	0.332724	3.74762	0.266836
1423062_at	Igfbp3	16009	3	578.522	44.4217	168.533	0.0767848	0.291316	3.79393	0.263579
1460259_s_at	Clca1 /// Clca2	12722 /// 80797	3	142.522	11.7305	45.3101	0.0823066	0.317917	3.86259	0.258893
1422831_at	Fbn2	14119	3	317.685	31.8551	123.188	0.100273	0.387769	3.86714	0.258589
1425039_at	Itgbl1	223272	3	152.855	11.4701	46.233	0.0750388	0.302463	4.03076	0.248092
1415935_at	Smoc2	64074	3	164.855	12.1042	51.5012	0.0734235	0.312403	4.25481	0.235028
1458268_s_at	Igfbp3	16009	3	420.181	20.638	121.522	0.049117	0.289213	5.88824	0.16983
1422313_a_at	Igfbp5	16011	3	326.522	14.491	93.1886	0.0443798	0.285398	6.43081	0.155501
1415832_at	Agtr2	11609	3	660.022	8.57115	61.4289	0.0129862	0.0930711	7.16694	0.13953
1449528_at	Figf	14205	3	338.985	10.5067	81.5244	0.0309945	0.240495	7.75928	0.128878
1435299_at	Cdk7	12572	4	279.855	93.121	219.699	0.332747	0.785047	2.35929	0.423857
1419638_at	Efnb2	13642	4	349.073	113.691	276.522	0.325694	0.79216	2.43222	0.411147
1456346_at	---	---	4	34.0098	10.7987	26.3424	0.317518	0.774554	2.4394	0.409937
1449520_at	Ttc28	209683	4	271.835	86.5226	211.188	0.31829	0.776898	2.44085	0.409694
1448152_at	Igf2	16002	4	354.65	113.84	278.522	0.320991	0.785342	2.44661	0.408728
1427153_at	Bckdhb	12040	4	129.128	42.5371	104.522	0.329418	0.809443	2.45719	0.406969
1457632_s_at	Meis2	17536	4	90.138	29.7901	73.2013	0.330494	0.812103	2.45724	0.406961
1438294_at	Atxn1	20238	4	476.827	155.72	385.855	0.326576	0.809214	2.47787	0.403572
1451277_at	Zadh2	225791	4	390.825	121.855	303.188	0.31179	0.775766	2.48811	0.401912
1437639_at	Fam115a	77574	4	80.3431	25.8019	64.3156	0.321146	0.800512	2.49267	0.401176
1417027_at	Trim2	80890	4	130.522	39.9003	100.141	0.305699	0.767236	2.50978	0.398441
1423739_x_at	Aplp2	11804	4	2005.54	653.188	1642.19	0.325693	0.818828	2.51411	0.397755
1456294_at	Rnft1	76892	4	133.755	44.2349	111.522	0.330716	0.833776	2.52112	0.396648
1436118_at	Vangl2	93840	4	72.2335	23.7481	59.9676	0.328769	0.830191	2.52515	0.396016
1450852_s_at	F2r	14062	4	1252.63	394.188	996.425	0.31469	0.795469	2.52779	0.395603
1433711_s_at	LOC100047324 /// Sesn1	100047324 /// 140742	4	266.416	80.525	205.047	0.302253	0.769649	2.54637	0.392715
1424438_a_at	Leprot	230514	4	449.855	138.946	354.357	0.308868	0.787714	2.55032	0.392107
1456133_x_at	Itgb5	16419	4	820.66	253.522	648.415	0.308924	0.790114	2.55763	0.390987
1417214_at	Rab27b	80718	4	63.916	20.8744	53.671	0.326591	0.839712	2.57114	0.388932
1451200_at	Kif1b	16561	4	734.502	220.522	567.513	0.300233	0.77265	2.5735	0.388576
1452611_at	Rnf160	78913	4	233.855	70.5223	181.919	0.301564	0.777912	2.57959	0.387659
1435274_at	Spopl	76857	4	143.445	47.7446	123.188	0.332842	0.858783	2.58015	0.387574
1451289_at	Dclk1	13175	4	46.7084	15.1382	39.1924	0.3241	0.839087	2.58898	0.386253
1437627_at	Mex3d	237400	4	176.188	55.1671	144.303	0.313115	0.819026	2.61574	0.382301
1432198_at	---	---	4	75.6763	23.5232	61.9384	0.31084	0.818465	2.63308	0.379784
1443620_at	Gpc4	14735	4	1014.86	323.766	853.522	0.319027	0.841028	2.63623	0.37933
1423321_at	Myadm	50918	4	1927.19	640.719	1702.31	0.332463	0.883314	2.65688	0.376382
1428326_s_at	Hrsp12	15473	4	204.905	58.8631	156.855	0.287271	0.765502	2.66474	0.375271
1452145_at	H6pd	100198	4	179.855	51.8815	138.478	0.288463	0.769941	2.66911	0.374656
1422465_a_at	Nxn	18230	4	471.087	135.966	365.522	0.288622	0.775911	2.68833	0.371978
1450928_at	LOC100045546	100045546	4	283.527	88.244	237.855	0.311236	0.838914	2.69543	0.370999
1416357_a_at	Mcam	84004	4	90.2243	29.1296	79.1924	0.322858	0.877728	2.71862	0.367833
1421887_a_at	Aplp2	11804	4	1798.71	512.855	1395.99	0.285124	0.776108	2.722	0.367376
1440015_at	---	---	4	209.188	64.6111	176.272	0.308865	0.842647	2.7282	0.366542
1431057_a_at	Prss23	76453	4	1437.41	409.522	1118.86	0.284902	0.77838	2.7321	0.366019
1418926_at	Zeb1	21417	4	947.853	264.188	723.028	0.278723	0.762806	2.73679	0.365392
1449188_at	Midn	59090	4	607.073	185.283	512.522	0.305208	0.844251	2.76615	0.361513
1429623_at	Zfp644	52397	4	564.522	154.708	431.803	0.274052	0.764901	2.79108	0.358284
1438815_at	Hist2h2aa1 /// Hist2h2aa2	15267 /// 319192	4	121.785	34.4406	96.1885	0.282798	0.78982	2.79288	0.358053
1427256_at	Vcan	13003	4	1544.71	417.807	1167.52	0.270476	0.755818	2.7944	0.357858
1442115_at	Fam38b	225617	4	1859.4	524.188	1467.23	0.281912	0.789088	2.79905	0.357264
1424224_at	Asb8	78541	4	67.8918	18.975	53.1639	0.279489	0.783068	2.80178	0.356916
1428796_at	Bbx	70508	4	1314.76	353.855	993.117	0.269141	0.755361	2.80657	0.356307
1449090_a_at	Yes1	22612	4	445.855	146.947	412.722	0.329584	0.925687	2.80866	0.356042
1459793_s_at	Lyrm5	67636	4	889.855	256.75	721.982	0.28853	0.811348	2.81201	0.355618
1451109_a_at	Nedd4	17999	4	735.791	199.855	562.522	0.271619	0.764513	2.81465	0.355284
1455154_at	Gli3	14634	4	768.218	204.445	575.522	0.266129	0.749165	2.81505	0.355234
1434026_at	Atp8b2	54667	4	654.188	211.207	594.814	0.322853	0.909239	2.81627	0.35508
1425914_a_at	Armcx1	78248	4	166.522	45.2134	127.522	0.271517	0.765796	2.82044	0.354555
1454994_at	Klhl20	226541	4	462.93	141.522	400.188	0.305709	0.864469	2.82775	0.353638
1452290_at	Tmem106b	71900	4	284.054	77.1944	218.522	0.27176	0.769298	2.8308	0.353257
1426570_a_at	Frk	14302	4	36.0412	10.2782	29.1008	0.285179	0.80743	2.83131	0.353194
1435665_at	AI451617	209387	4	138.362	42.5625	120.522	0.307617	0.871062	2.83164	0.353152
1415998_at	Vdac1	22333	4	942.522	251.374	713.855	0.266703	0.757388	2.83982	0.352136
1436960_at	Brd3	67382	4	603.855	171.692	487.81	0.284326	0.807826	2.8412	0.351965
1424157_at	Ehd2	259300	4	659.084	209.188	597.532	0.317392	0.90661	2.85643	0.350087
1425505_at	Mylk	107589	4	76.404	23.7239	67.9592	0.310506	0.889472	2.86459	0.349091
1429233_at	41163	52398	4	1671.92	458.936	1321.86	0.274497	0.790622	2.88026	0.347191
1452412_at	Hoxc8	15426	4	418.855	109.36	317.188	0.261093	0.757275	2.9004	0.34478
1433598_at	Arglu1	234023	4	592.331	165.837	486.522	0.279974	0.821368	2.93373	0.340863
1455521_at	Klf12	16597	4	68.3688	19.2474	56.6947	0.281523	0.829248	2.94558	0.339491
1452740_at	Myh10	77579	4	923.84	278.188	820.576	0.301122	0.888223	2.94971	0.339016
1422804_at	Serpinb6b	20708	4	108.522	29.8613	88.2565	0.275164	0.813261	2.95555	0.338346
1429234_s_at	41163	52398	4	1434.68	365.522	1081.47	0.254775	0.753804	2.9587	0.337986
1428234_at	Cpsf6	432508	4	64.6296	19.4872	57.6721	0.301521	0.892347	2.95949	0.337897
1430133_at	Tbc1d8b	245638	4	128.522	38.2656	113.522	0.297737	0.883288	2.96668	0.337077
1426864_a_at	Ncam1	17967	4	2503.19	721.554	2148.68	0.288254	0.858378	2.97785	0.335812
1416638_at	Sall2	50524	4	34.377	9.65291	28.755	0.280795	0.83646	2.9789	0.335695
1436877_at	Lrch2	210297	4	239.855	72.2116	215.383	0.301063	0.89797	2.98266	0.335271
1434070_at	Jag1	16449	4	2642.19	750.811	2248.39	0.284163	0.850956	2.99461	0.333933
1435987_x_at	1110059G02Rik	68786	4	37.8593	11.1967	33.5476	0.295745	0.886112	2.9962	0.333756
1415822_at	Scd2	20250	4	2876.62	899.522	2700.19	0.312701	0.938666	3.0018	0.333133
1415999_at	Hey1	15213	4	27.7968	9.24597	27.7968	0.332628	1	3.00636	0.332628
1420874_at	Twf1	19230	4	314.843	86.2822	260.188	0.274048	0.826406	3.01555	0.331614
1427165_at	Il13ra1	16164	4	86.6446	20.8357	62.9264	0.240473	0.726259	3.02013	0.331112
1436030_at	Cachd1	320508	4	57.6721	14.5668	44.1034	0.252579	0.764727	3.02767	0.330287
1422018_at	Hivep2	15273	4	134.208	40.0463	121.522	0.298389	0.905469	3.03453	0.32954
1454733_at	Nod1	107607	4	83.5234	25.3489	77.3663	0.303494	0.926282	3.05206	0.327647
1452545_a_at	Itgb1	16412	4	786.855	194.511	594.078	0.2472	0.755004	3.05422	0.327416
1421612_a_at	H2afy2 /// H2afy3	404634 /// 67552	4	315.188	97.6055	300.188	0.309673	0.952409	3.07553	0.325147
1422614_s_at	Bloc1s1	14533	4	200.634	52.8168	162.508	0.26325	0.809972	3.07682	0.325011
1453581_at	Cep170	545389	4	307.188	80.5386	248.855	0.26218	0.810106	3.08989	0.323637
1415944_at	Sdc1	20969	4	299.137	77.1944	238.799	0.258057	0.798294	3.09348	0.32326
1448545_at	Sdc2	15529	4	593.522	176.099	545.057	0.296702	0.918343	3.09517	0.323084
1451978_at	Loxl1	16949	4	837.188	200.802	621.768	0.239853	0.742685	3.09641	0.322954
1436188_a_at	Ndrg4	234593	4	106.301	32.7525	102.522	0.308112	0.964451	3.13019	0.319469
1421821_at	Ldlr	16835	4	712.41	204.188	640.855	0.286616	0.899559	3.13855	0.318619
1452430_s_at	LOC100048559 /// Sfrs1	100048559 /// 110809	4	87.3038	23.9273	75.1972	0.27407	0.861329	3.14274	0.318194
1422659_at	Camk2d	108058	4	769.855	189.227	595.762	0.245796	0.773862	3.14839	0.317622
1428650_at	Tns1	21961	4	307.188	86.2817	271.962	0.280875	0.885326	3.15202	0.317256
1448590_at	Col6a1	12833	4	1473.04	353.855	1115.94	0.24022	0.757573	3.15366	0.317092
1437448_s_at	Ctnnd1	12388	4	1491.52	403.522	1272.86	0.270544	0.853395	3.15437	0.317021
1433500_at	Dennd2a	209773	4	430.188	104.199	330.75	0.242218	0.768849	3.17421	0.315039
1426918_at	Itgb1	16412	4	1188.52	300.801	955.522	0.253088	0.803958	3.1766	0.314802
1435041_at	Gm10080 /// Gm11836 /// Gm5526 /// Myl6	100043172 /// 17904 /// 433297 /// 433688	4	250.522	72.7768	231.188	0.290501	0.922828	3.17668	0.314794
1423259_at	Id4 /// LOC100045546	100045546 /// 15904	4	316.188	103.449	328.647	0.327174	1.0394	3.17692	0.314771
1435184_at	Npr3	18162	4	182.855	58.6735	186.437	0.320874	1.01959	3.17754	0.314709
1434000_at	Kras	16653	4	737.345	225.188	715.855	0.305404	0.970855	3.17892	0.314573
1426358_at	Taok1	216965	4	208.707	54.8631	174.522	0.262871	0.836203	3.18104	0.314363
1418545_at	Wasf1	83767	4	347.16	95.9311	305.188	0.276331	0.879099	3.18133	0.314334
1434101_at	Nfib	18028	4	548.188	126.389	403.188	0.230558	0.735492	3.19005	0.313475
1429556_at	2610024B07Rik	269987	4	1129.76	276.184	884.188	0.244463	0.782635	3.20145	0.312358
1428393_at	Nrn1	68404	4	57.9122	16.4083	52.8168	0.28333	0.912016	3.21892	0.310664
1418997_at	Lyrm5	67636	4	495.232	134.468	432.855	0.271525	0.874044	3.21902	0.310654
1417599_at	Cd276	102657	4	258.47	63.0458	203.188	0.243919	0.786121	3.22287	0.310282
1433976_at	Reep3	28193	4	192.238	51.2526	165.855	0.266609	0.862757	3.23603	0.30902
1419477_at	Clec2d	93694	4	302.134	69.2018	224.188	0.229044	0.742017	3.23963	0.308677
1450922_a_at	Tgfb2	21808	4	134.522	41.1312	133.522	0.305759	0.992566	3.24624	0.308049
1460379_at	Hoxb4	15412	4	55.4128	12.4703	40.6974	0.225043	0.734441	3.26355	0.306415
1415824_at	Scd2	20250	4	141.522	41.8301	136.901	0.295574	0.96735	3.27279	0.30555
1417472_at	Myh9	17886	4	1197.74	283.829	931.855	0.23697	0.77801	3.28315	0.304585
1427131_s_at	Lrrc58	320184	4	462.917	113.027	371.855	0.244161	0.803286	3.28998	0.303953
1457248_x_at	Hsd17b7	15490	4	153.619	36.9495	122.188	0.240527	0.795399	3.30691	0.302398
1423994_at	Kif1b	16561	4	328.522	81.1531	268.717	0.247025	0.817959	3.31124	0.302002
1427314_at	Tmed7	66676	4	834.824	192.33	636.855	0.230384	0.762862	3.31126	0.302
1428125_at	ENSMUSG00000074747	382423	4	296.522	84.0801	278.832	0.283555	0.940344	3.31627	0.301543
1422498_at	Mageh1	75625	4	72.7346	18.975	62.9264	0.260881	0.865151	3.31627	0.301543
1423055_at	Nsg1	18196	4	285.855	75.6883	252.297	0.264779	0.882604	3.33337	0.299997
1427580_a_at	Rian	75745	4	68.4457	16.9899	56.6947	0.248224	0.828317	3.33697	0.299673
1428111_at	Slc38a4	69354	4	166.522	43.4844	145.507	0.261133	0.873804	3.3462	0.298847
1424130_a_at	Ptrf	19285	4	462.762	125.237	419.855	0.270629	0.90728	3.35248	0.298286
1436970_a_at	Pdgfrb	18596	4	711.485	157.266	527.522	0.221039	0.741438	3.35433	0.298122
1426865_a_at	Ncam1	17967	4	2270.76	614.54	2065.86	0.270632	0.909763	3.36163	0.297475
1441768_at	9430051O21Rik	77339	4	172.641	47.5524	159.855	0.275442	0.92594	3.36166	0.297472
1450379_at	Msn	17698	4	57.6721	14.4716	48.835	0.250928	0.846771	3.37455	0.296336
1448165_at	Casp2	12366	4	119.904	33.0229	111.522	0.275411	0.930092	3.3771	0.296112
1421172_at	Adam12	11489	4	445.352	96.7909	329.522	0.217336	0.739913	3.40447	0.293732
1454708_at	Ablim1	226251	4	438.944	97.3854	332.188	0.221863	0.756789	3.41107	0.293163
1418132_a_at	Ubfd1	28018	4	48.3563	10.9178	37.3007	0.225778	0.771372	3.41651	0.292697
1427232_at	Tshz1	110796	4	74.1991	20.655	70.5984	0.278372	0.951473	3.41799	0.29257
1424377_at	Rsl24d1	225215	4	1587.19	378.926	1300.72	0.23874	0.819512	3.43265	0.29132
1456482_at	Pik3r3	18710	4	227.984	57.6721	198.188	0.252965	0.869308	3.43647	0.290996
1421694_a_at	Vcan	13003	4	307.188	67.9633	233.602	0.221243	0.760454	3.43719	0.290936
1455893_at	Rspo2	239405	4	78.9829	18.512	63.916	0.23438	0.809239	3.45268	0.28963
1454945_at	Cep97	74201	4	143.855	40.0926	138.522	0.278701	0.962926	3.45505	0.289432
1438441_at	Id4	15904	4	384.188	120.205	417.504	0.312879	1.08672	3.47328	0.287912
1425528_at	Prrx1	18933	4	2058.33	444.73	1545.52	0.216063	0.75086	3.47519	0.287754
1456404_at	Adamts5 /// LOC100048332	100048332 /// 23794	4	1334.78	283.857	990.188	0.212663	0.741839	3.48833	0.28667
1449082_at	Mfap5	50530	4	177.188	39.0371	136.413	0.220314	0.769875	3.49445	0.286168
1416612_at	Cyp1b1	13078	4	1534.79	316.592	1108.86	0.206277	0.722478	3.50247	0.285513
1451191_at	Crabp2	12904	4	167.256	40.6974	142.563	0.243324	0.852364	3.503	0.285469
1450851_at	Wdr1	22388	4	548.188	117.423	411.478	0.214202	0.750613	3.50423	0.28537
1436299_at	Gls	14660	4	354.188	94.7015	332.804	0.267376	0.939625	3.51424	0.284556
1439514_at	A930004D18Rik	77940	4	165.855	42.167	148.185	0.25424	0.893462	3.51424	0.284556
1417148_at	Pdgfrb	18596	4	676.188	144.202	506.922	0.213257	0.749675	3.51536	0.284466
1436514_at	Gpc4	14735	4	3051.52	671.689	2364.04	0.220116	0.774708	3.51954	0.284128
1419015_at	Wisp2	22403	4	190.844	46.1403	162.855	0.241769	0.85334	3.52957	0.283321
1417461_at	Cap1	12331	4	725.188	167.056	589.855	0.230363	0.813382	3.53088	0.283216
1436729_at	Afap1	70292	4	2292.1	567.218	2004.19	0.247467	0.874391	3.53337	0.283016
1426873_s_at	Jup	16480	4	246.855	66.3625	234.804	0.268832	0.95118	3.53819	0.28263
1424692_at	2810055F11Rik	67217	4	115.858	24.3062	86.5226	0.209793	0.746799	3.55969	0.280923
1427883_a_at	Col3a1	12825	4	4991.29	1028.84	3681.19	0.206126	0.737522	3.57802	0.279485
1435785_at	Ehd2	259300	4	1190.72	262.54	942.522	0.220488	0.791555	3.59001	0.278551
1434149_at	Tcf4	21413	4	468.188	90.7835	326.902	0.193904	0.698229	3.6009	0.277708
1417234_at	Mmp11	17385	4	174.307	33.8732	122.188	0.194331	0.700996	3.60723	0.277221
1438245_at	---	---	4	101.855	23.2172	84.1906	0.227943	0.826572	3.62622	0.275769
1442595_at	---	---	4	226.188	66.9716	243.534	0.296088	1.07669	3.63638	0.274999
1436346_at	Cd109	235505	4	381.317	109.644	399.188	0.28754	1.04687	3.64077	0.274667
1447946_at	Adam23	23792	4	1149.85	261.812	954.522	0.227693	0.83013	3.64582	0.274286
1418402_at	Adam19 /// LOC100045780	100045780 /// 11492	4	447.117	101.978	372.855	0.228078	0.833909	3.65625	0.273504
1454867_at	Mn1	433938	4	581.522	110.348	409.522	0.189758	0.704224	3.71117	0.269457
1422533_at	Cyp51	13121	4	103.855	31.5265	117.391	0.303563	1.13033	3.72355	0.268561
1454780_at	Galntl4	233733	4	138.522	29.742	110.924	0.21471	0.80077	3.72953	0.26813
1434675_at	Zfp763	73451	4	236.648	54.7489	204.188	0.231352	0.862837	3.72954	0.26813
1422818_at	Nedd9	18003	4	153.855	28.2628	105.488	0.183698	0.685636	3.73241	0.267924
1433977_at	Hs3st3b1	54710	4	97.2906	21.2618	79.4166	0.218539	0.816283	3.73518	0.267725
1452968_at	Cthrc1	68588	4	283.188	65.2744	244.14	0.230498	0.862113	3.74021	0.267365
1455591_at	Zfp618	72701	4	203.707	42.9503	160.855	0.210843	0.789639	3.74515	0.267012
1416158_at	Nr2f2	11819	4	772.522	182.843	686.285	0.236684	0.888369	3.7534	0.266425
1433632_at	Irf2bp2	270110	4	687.188	154.017	582.686	0.224127	0.847928	3.78325	0.264323
1425575_at	Epha3	13837	4	172.679	31.7539	120.522	0.18389	0.697952	3.79549	0.263471
1422601_at	Serpinb9	20723	4	149.855	32.7427	124.494	0.218496	0.830765	3.8022	0.263006
1452328_s_at	Pja2	224938	4	85.5228	17.7307	67.4271	0.207322	0.78841	3.80284	0.262962
1423110_at	Col1a2	12843	4	5300.39	1095.72	4208.52	0.206725	0.794002	3.84086	0.260358
1460302_at	Thbs1	21825	4	3731.83	693.855	2674.15	0.185929	0.71658	3.85405	0.259467
1418020_s_at	Cpd	12874	4	171.522	43.8005	170.522	0.255364	0.99417	3.89314	0.256862
1419485_at	Foxc1	17300	4	282.131	52.3801	204.188	0.185659	0.723736	3.8982	0.256528
1449682_s_at	Tubb2a-ps2 /// Tubb2b	627110 /// 73710	4	129.121	29.0515	113.522	0.224994	0.879188	3.9076	0.255912
1426988_at	Klhdc5	232539	4	531.522	110.746	434.855	0.208357	0.818132	3.92659	0.254674
1423176_at	Tob1	22057	4	496.829	103.981	408.522	0.209289	0.822258	3.92882	0.25453
1435691_at	C630028N24Rik	235386	4	97.1884	17.7162	69.7265	0.182287	0.717436	3.93575	0.254081
1426858_at	Inhbb /// LOC100046802	100046802 /// 16324	4	271.855	54.8722	217.009	0.201844	0.798254	3.95481	0.252857
1433489_s_at	Fgfr2	14183	4	299.522	56.0833	222.426	0.187243	0.742604	3.966	0.252144
1452763_at	Nipa1	233280	4	80.9216	17.0253	67.8122	0.210393	0.837999	3.98303	0.251065
1422139_at	Plau	18792	4	43.1713	10.7987	43.1713	0.250137	1	3.99782	0.250137
1434316_at	Chsy1 /// LOC100047167	100047167 /// 269941	4	869.188	147.113	589.855	0.169254	0.678627	4.00953	0.249406
1455529_at	Mex3a	72640	4	108.277	23.1647	93.1886	0.213939	0.860651	4.02288	0.248578
1451122_at	Idi1	319554	4	398.214	105.522	425.37	0.264988	1.0682	4.03112	0.24807
1448460_at	Acvr1	11477	4	472.756	85.647	349.522	0.181165	0.739328	4.08096	0.245041
1452250_a_at	Col6a2	12834	4	674.522	123.156	506.391	0.182583	0.750741	4.11178	0.243204
1455246_at	Smarcc1	20588	4	148.718	24.3185	100.522	0.163521	0.675923	4.13356	0.241922
1425526_a_at	Prrx1	18933	4	652.188	112.731	466.522	0.17285	0.715317	4.13837	0.241641
1416613_at	Cyp1b1	13078	4	210.188	34.577	143.759	0.164505	0.683955	4.15766	0.24052
1428646_at	LOC676870 /// Pbx1	18514 /// 676870	4	103.925	16.6357	69.2149	0.160074	0.666009	4.16063	0.240348
1416066_at	Cd9	12527	4	1099.86	201.782	843.546	0.183462	0.766961	4.18049	0.239207
1455300_at	Tet2	214133	4	300.836	50.7325	212.188	0.168639	0.70533	4.18249	0.239092
1454877_at	Sertad4	214791	4	635.163	122.04	512.522	0.192139	0.806913	4.19962	0.238117
1439713_at	Itga1	109700	4	116.188	18.4883	78.1933	0.159124	0.672987	4.22933	0.236444
1423407_a_at	Fbln2	14115	4	1378.86	214.208	909.451	0.155352	0.65957	4.24565	0.235535
1434729_at	Zc4h2	245522	4	77.8608	15.5549	66.0663	0.199778	0.848519	4.24731	0.235443
1433633_at	Irf2bp2	270110	4	1499.56	286.926	1227.19	0.19134	0.818368	4.27703	0.233807
1417312_at	Dkk3	50781	4	287.034	51.1047	220.522	0.178044	0.768277	4.3151	0.231744
1428774_at	Gpc6	23888	4	1011.24	157.855	683.587	0.1561	0.675987	4.33047	0.230922
1448219_a_at	Ywhaz	22631	4	2917.48	510.735	2219.86	0.17506	0.760882	4.34639	0.230076
1417129_a_at	Meis2	17536	4	328.522	69.3605	301.865	0.211129	0.91886	4.35212	0.229773
1452966_at	Bcl11b	58208	4	109.926	18.0944	79.1924	0.164606	0.720415	4.37662	0.228487
1416164_at	Fbln5	23876	4	3444.52	533.805	2343.17	0.154972	0.680261	4.38957	0.227813
1454966_at	Itga8	241226	4	257.195	41.6431	183.188	0.161913	0.712255	4.39901	0.227324
1428384_at	D4Bwg0951e	52829	4	448.054	84.2586	371.855	0.188055	0.829934	4.41326	0.22659
1429509_at	Lsm12	268490	4	417.024	79.1255	350.522	0.189739	0.840532	4.42994	0.225736
1450020_at	Cx3cr1	13051	4	186.855	31.9329	142.855	0.170896	0.764522	4.4736	0.223534
1439044_at	Zfp354c	30944	4	236.66	42.2581	189.188	0.178561	0.799412	4.47698	0.223365
1425506_at	Mylk	107589	4	758.522	142.011	636.64	0.187221	0.839316	4.48302	0.223064
1452792_at	Dzip1	66573	4	553.399	86.7535	394.188	0.156765	0.712304	4.54377	0.220081
1451344_at	Tmem119	231633	4	387.855	67.5047	309.01	0.174046	0.796716	4.57761	0.218454
1416808_at	Nid1	18073	4	2038.15	373.096	1714.86	0.183056	0.841379	4.59629	0.217567
1418403_at	Adam19 /// LOC100045780	100045780 /// 11492	4	193.855	36.0545	165.795	0.185987	0.855254	4.59846	0.217464
1434265_s_at	Ank2	109676	4	272.343	49.6164	228.188	0.182184	0.837872	4.59905	0.217436
1450731_s_at	Tnfrsf21	94185	4	86.942	15.0465	69.2149	0.173064	0.796104	4.60007	0.217388
1451446_at	Antxr1	69538	4	1730.7	274.113	1266.19	0.158383	0.731606	4.61923	0.216487
1419587_s_at	Rp2h	19889	4	217.169	35.01	165.855	0.161211	0.763715	4.73737	0.211088
1451756_at	Flt1	14254	4	1419.07	191.585	917.522	0.135007	0.646565	4.7891	0.208807
1431684_at	Rlbp1l1	74438	4	201.188	28.4537	137.522	0.141428	0.683547	4.83317	0.206903
1437417_s_at	Gpc6	23888	4	658.188	94.2015	457.635	0.143122	0.695296	4.85805	0.205844
1425895_a_at	Id1	15901	4	116.188	34.4573	168.891	0.296564	1.45359	4.90145	0.204021
1452595_at	Adamts4	240913	4	277.221	46.029	227.188	0.166037	0.819521	4.93577	0.202603
1437173_at	S1pr3	13610	4	626.522	83.7162	417.779	0.133621	0.666824	4.99043	0.200384
1427231_at	Robo1	19876	4	411.188	55.5345	278.522	0.135059	0.677358	5.01529	0.19939
1454791_a_at	Rbbp4	19646	4	46.4661	7.70358	38.9416	0.165789	0.838065	5.055	0.197824
1425521_at	Paip1	218693	4	293.579	38.0768	192.855	0.129699	0.656911	5.0649	0.197437
1422993_s_at	Refbp2 /// Thoc4	21681 /// 56009	4	159.297	21.5565	109.522	0.135323	0.68753	5.08067	0.196824
1433783_at	Ldb3	24131	4	93.832	17.157	87.5224	0.182848	0.932756	5.10126	0.19603
1424131_at	Col6a3	12835	4	776.522	118.929	609.819	0.153156	0.785321	5.1276	0.195023
1423310_at	Tpbg	21983	4	1378.29	189.917	998.522	0.137792	0.724463	5.25766	0.190199
1448529_at	Thbd	21824	4	1513.19	189.293	1019.5	0.125095	0.673741	5.38582	0.185673
1451895_a_at	Dhcr24	74754	4	74.1035	11.2951	61.9384	0.152423	0.835836	5.48365	0.18236
1433446_at	Hmgcs1	208715	4	868.188	141.198	781.287	0.162636	0.899906	5.53326	0.180725
1417724_at	Thoc4	21681	4	83.5234	12.5972	71.8574	0.150823	0.860327	5.70423	0.175308
1455528_at	---	---	4	120.188	14.8238	85.4863	0.123338	0.711269	5.76684	0.173405
1437632_at	Med14	26896	4	257.694	38.0768	222.9	0.14776	0.864981	5.85397	0.170824
1460208_at	Fbn1	14118	4	1391.97	163.322	956.855	0.117331	0.687409	5.8587	0.170686
1452789_at	Snn	20621	4	137.522	17.0416	100.522	0.123919	0.730952	5.89862	0.169531
1439557_s_at	Ldb2	16826	4	121.188	13.949	84.1873	0.115101	0.694681	6.03538	0.16569
1434264_at	Ank2	109676	4	720.274	85.5228	524.322	0.118737	0.727948	6.13078	0.163111
1415972_at	Marcks	17118	4	2917.93	358.912	2231.86	0.123002	0.764877	6.21839	0.160813
1448823_at	Cxcl12	20315	4	3310.01	349.691	2200.52	0.105646	0.664808	6.29276	0.158913
1427167_at	Armcx4	102910	4	114.77	18.8176	119.522	0.163959	1.0414	6.35159	0.157441
1424101_at	Hnrnpl	15388	4	183.689	19.5734	126.522	0.106558	0.688784	6.46396	0.154704
1431353_at	Pabpc4l	241989	4	93.1886	14.9251	98.6857	0.160161	1.05899	6.61204	0.151239
1428259_at	Pxdn	69675	4	714.582	65.7257	437.855	0.0919778	0.612743	6.66186	0.150108
1423380_s_at	Nfatc4	73181	4	273.67	27.7904	189.188	0.101547	0.6913	6.80769	0.146893
1455965_at	Adamts4	240913	4	193.613	19.816	135.522	0.102349	0.699964	6.83901	0.14622
1422889_at	Pcdh18	73173	4	1299.56	127.1	897.188	0.0978021	0.690379	7.05893	0.141665
1425896_a_at	Fbn1	14118	4	756.855	72.9905	524.522	0.0964392	0.693028	7.18617	0.139156
1435698_at	Rictor	78757	4	290.226	30.6751	222.522	0.105694	0.766718	7.25415	0.137852
1433891_at	Lgr4	107515	4	633.729	49.5398	362.522	0.078172	0.572045	7.31778	0.136653
1430392_at	9530086O07Rik	78741	4	173.522	20.8895	154.3	0.120385	0.889228	7.38651	0.135382
1421171_at	Adam12	11489	4	231.188	22.6597	169.373	0.0980141	0.732617	7.47461	0.133786
1415823_at	Scd2	20250	4	1975.66	253.522	1896.86	0.128323	0.960113	7.48202	0.133654
1456160_at	---	---	4	172.522	15.9059	120.909	0.0921965	0.700836	7.60155	0.131552
1426640_s_at	Trib2	217410	4	338.188	33.1208	260.188	0.0979359	0.769359	7.85575	0.127295
1440990_at	Kif26b	269152	4	312.188	26.6257	211.495	0.0852873	0.67746	7.94327	0.125893
1426934_at	Nhsl1	215819	4	357.773	28.5404	235.855	0.0797725	0.659231	8.26389	0.121008
1433525_at	Ednra	13617	4	423.718	30.1855	256.522	0.0712394	0.605406	8.49819	0.117672
1449315_at	Odz3	23965	4	483.306	30.3928	264.188	0.0628851	0.546627	8.69247	0.115042
1436736_x_at	D0H4S114	27528	4	198.522	13.4282	117.588	0.067641	0.592319	8.75681	0.114197
1436055_at	Lrrc15	74488	4	342.392	23.3608	212.188	0.0682282	0.619724	9.0831	0.110095
1434195_at	Prss35	244954	4	142.522	12.1463	118.047	0.085224	0.828277	9.71882	0.102893
1438531_at	A730054J21Rik	320862	4	435.936	25.8019	251.522	0.0591873	0.57697	9.7482	0.102583
1423311_s_at	Tpbg	21983	4	860.522	35.4442	433.03	0.0411892	0.503219	12.2172	0.0818516
1427884_at	Col3a1	12825	4	2530.68	114.614	1470.36	0.0452898	0.581012	12.8288	0.0779498
1419089_at	Timp3	21859	4	3255.42	134.925	1791.19	0.0414464	0.550217	13.2754	0.0753273
1450839_at	D0H4S114	27528	4	423.024	15.0164	241.855	0.0354978	0.571728	16.106	0.0620886
1418534_at	Fzd2	57265	4	1145.86	33.9497	572.449	0.0296283	0.499583	16.8617	0.059306
1417439_at	Cd248	70445	4	796.381	21.1214	388.855	0.0265217	0.488278	18.4105	0.0543168
1416855_at	Gas1	14451	4	2238.19	19.7319	870.188	0.00881604	0.388791	44.1005	0.0226755
1449981_a_at	Nat2	17961	5	34.377	11.341	22.1808	0.329901	0.645221	1.9558	0.511299
1434037_s_at	Kat2b	18519	5	607.006	198.124	400.188	0.326396	0.659282	2.01988	0.495078
1434721_at	Ankle2	71782	5	874.522	285.108	584.522	0.326016	0.66839	2.05018	0.487763
1415874_at	LOC100046643 /// Spry1	100046643 /// 24063	5	272.148	85.5228	175.453	0.314251	0.644697	2.05154	0.487439
1438861_at	Bnc2	242509	5	217.522	71.9091	147.758	0.330584	0.679278	2.05478	0.48667
1419557_a_at	Tmem9	66241	5	43.1386	14.0491	28.8723	0.325674	0.669292	2.0551	0.486595
1416262_at	Tmem19	67226	5	136.8	44.6857	92.1886	0.32665	0.673894	2.06304	0.484721
1440879_at	Abca9	217262	5	97.1884	30.4152	63.2432	0.31295	0.650727	2.07933	0.480924
1454023_a_at	Chpf	74241	5	41.5878	13.3752	27.9276	0.321613	0.671533	2.08802	0.478923
1416918_at	Dlg3	53310	5	498.349	159.855	335.759	0.320769	0.673743	2.1004	0.4761
1423885_at	Lamc1	226519	5	316.188	101.608	213.457	0.321353	0.675093	2.10079	0.476013
1435266_at	Scai	320271	5	141.522	41.7685	88.0104	0.295139	0.621886	2.1071	0.474587
1425940_a_at	Ssbp3	72475	5	151.22	46.1117	97.1884	0.304931	0.642696	2.10767	0.474457
1457753_at	Tlr13	279572	5	174.522	57.7939	121.887	0.331156	0.698408	2.109	0.474158
1460455_at	Ubr3	68795	5	249.694	81.901	173.522	0.328006	0.694938	2.11868	0.471993
1453109_at	Arsk	77041	5	334.188	109.083	231.562	0.326413	0.692908	2.12279	0.471077
1420429_at	Pcdhb3	93874	5	33.6302	10.0077	21.2618	0.29758	0.632223	2.12455	0.470688
1449688_at	D10Ertd610e	52666	5	182.447	59.5172	126.522	0.326217	0.693473	2.1258	0.470411
1428325_at	Cnpy4	66455	5	369.171	118.141	251.522	0.320016	0.681314	2.129	0.469704
1422587_at	Tmem45a	56277	5	246.855	81.2518	173.522	0.329148	0.70293	2.13561	0.468251
1444606_at	Efna2	13637	5	73.2013	22.3085	47.83	0.304756	0.653404	2.14402	0.466413
1455048_at	Igsf3	78908	5	237.177	66.558	142.855	0.280626	0.602313	2.14632	0.465913
1457043_at	B3galtl	381694	5	203.188	65.5109	140.806	0.322415	0.692985	2.14936	0.465255
1419689_at	Gpc6	23888	5	148.827	48.1594	103.522	0.323594	0.695585	2.14956	0.46521
1437290_at	Impad1	242291	5	369.855	120.074	258.338	0.32465	0.698486	2.1515	0.464792
1417281_a_at	Mmp23	26561	5	478.997	156.855	337.57	0.327466	0.704743	2.15211	0.46466
1446325_at	Pcyox1	66881	5	39.5098	11.1967	24.2983	0.28339	0.614994	2.17013	0.460802
1452982_at	Igf1r	16001	5	56.6947	18.214	40.0284	0.321264	0.706033	2.19767	0.455027
1445148_at	---	---	5	123.204	35.0909	77.1944	0.284819	0.626555	2.19984	0.454578
1421889_a_at	Aplp2	11804	5	163.855	45.3606	99.8989	0.276834	0.609678	2.20233	0.454065
1439496_at	Ston1	77057	5	884.855	267.811	589.965	0.302661	0.666736	2.20291	0.453944
1435223_at	Erlin2	244373	5	103.303	33.2046	73.2013	0.321429	0.708608	2.20455	0.453606
1429764_at	Fam101b	76566	5	55.2364	17.1186	37.7435	0.309916	0.683308	2.20482	0.453553
1420899_at	Rab18	19330	5	35.8574	10.7987	23.8393	0.301158	0.664837	2.2076	0.45298
1424713_at	Calml4	75600	5	36.9038	10.2109	22.5479	0.276689	0.610992	2.20822	0.452853
1435523_s_at	2700089E24Rik	381820	5	175.906	55.7203	123.502	0.316761	0.702092	2.21647	0.451168
1428622_at	Depdc6	97998	5	102.602	32.1202	71.207	0.313055	0.694009	2.21689	0.451082
1423824_at	Gpr177	68151	5	640.105	209.894	465.522	0.327905	0.727258	2.21789	0.450878
1416473_a_at	Igdcc4	56741	5	483.653	150.726	334.522	0.311641	0.691657	2.2194	0.450572
1437506_at	Adamts6	108154	5	83.1926	25.0976	55.7203	0.301681	0.669774	2.22014	0.450422
1424025_at	BC013529	215751	5	431.813	139.522	310.644	0.323107	0.719395	2.22649	0.449137
1449845_a_at	Ephb4	13846	5	36.6482	9.78138	21.8044	0.2669	0.594966	2.22917	0.448596
1443579_s_at	Depdc6	97998	5	167.522	50.5978	112.814	0.302037	0.673428	2.22962	0.448508
1438931_s_at	LOC100047324 /// Sesn1	100047324 /// 140742	5	306.522	100.729	224.848	0.32862	0.733545	2.2322	0.447989
1416411_at	Gstm2	14863	5	438.522	137.468	307.013	0.313481	0.70011	2.23334	0.447759
1437303_at	Il6st	16195	5	422.024	112.959	252.522	0.267659	0.598358	2.23552	0.447322
1418968_at	Rb1cc1	12421	5	872.406	280.769	628.522	0.321833	0.720446	2.23857	0.446714
1456756_at	E430016P22Rik	320578	5	56.6947	17.8965	40.085	0.315664	0.707032	2.23982	0.446464
1429293_at	Gpc2	71951	5	279.855	87.4793	196.391	0.312588	0.701761	2.245	0.445434
1439364_a_at	Mmp2	17390	5	605.467	166.267	373.855	0.27461	0.617466	2.24852	0.444737
1433434_at	AW551984	244810	5	34.1283	8.88263	20.0275	0.260272	0.58683	2.25468	0.443522
1416474_at	Igdcc4	56741	5	585.49	182.182	411.522	0.311162	0.702867	2.25885	0.442703
1448293_at	Ebf1	13591	5	175.786	45.5583	102.992	0.259169	0.585891	2.26066	0.442349
1433779_at	Casc4	319996	5	624.404	203.448	460.522	0.325827	0.737538	2.26359	0.441777
1435352_at	Pigk	329777	5	213.546	60.952	138.394	0.285428	0.648075	2.27054	0.440425
1456670_at	A930007A09Rik	432999	5	53.781	17.5433	40.1574	0.326199	0.746684	2.28904	0.436864
1450007_at	1500003O03Rik	56398	5	71.207	22.0948	50.5778	0.310289	0.710292	2.28913	0.436847
1416666_at	Serpine2	20720	5	968.407	277.822	636.855	0.286886	0.657632	2.29231	0.43624
1454677_at	Timp2	21858	5	2975.23	923.855	2120.58	0.310516	0.712747	2.29536	0.435661
1448134_at	X99384	27355	5	148.84	43.1477	99.1884	0.289892	0.666408	2.29881	0.435007
1428094_at	Lamp2	16784	5	2162.52	704.482	1622.26	0.325769	0.75017	2.30277	0.43426
1422571_at	Thbs2	21826	5	1256.07	322.399	742.855	0.256674	0.591414	2.30415	0.434
1425074_at	Wrn	22427	5	136.522	38.733	89.2546	0.283713	0.653776	2.30436	0.433961
1427568_a_at	Ift80	68259	5	341.522	107.43	247.834	0.314561	0.725675	2.30694	0.433474
1433778_at	Tnks	21951	5	306.604	98.6432	228.188	0.321728	0.744245	2.31327	0.432288
1425494_s_at	Bmpr1a	12166	5	429.369	126.188	292.06	0.293892	0.680208	2.31448	0.432063
1423805_at	Dab2	13132	5	643.855	212.643	492.522	0.330265	0.764957	2.31619	0.431743
1453571_at	Depdc6	97998	5	64.563	17.5449	40.6974	0.271748	0.630352	2.31962	0.431106
1422514_at	Aebp1	11568	5	611.522	180.387	418.607	0.29498	0.684534	2.32061	0.430921
1434948_at	Rab11fip2	74998	5	58.9678	19.384	45.225	0.328721	0.766944	2.33311	0.428612
1433939_at	Aff3	16764	5	423.797	120.178	280.522	0.283574	0.661924	2.33422	0.428409
1417399_at	Gas6	14456	5	2003.86	500.258	1170.99	0.249648	0.58437	2.34077	0.427209
1448519_at	Tead2	21677	5	125.855	39.8626	93.3393	0.316734	0.741642	2.34153	0.427072
1435888_at	Egfr	13649	5	159.127	46.3116	108.522	0.291036	0.681983	2.34329	0.42675
1434629_at	Zbtb26	320633	5	93.7054	29.9462	70.2106	0.319578	0.74927	2.34456	0.426519
1458370_at	Bmp2k	140780	5	656.331	172.522	404.522	0.262858	0.616338	2.34476	0.426483
1456067_at	Gli3	14634	5	350.489	110.522	259.506	0.315336	0.74041	2.34801	0.425893
1416009_at	Tspan3	56434	5	712.955	210.188	493.617	0.294813	0.692354	2.34845	0.425813
1435185_at	Lrrcc1	71710	5	45.9146	11.8645	27.8661	0.258404	0.606913	2.34869	0.425768
1450388_s_at	Twsg1	65960	5	1340.19	381.858	896.96	0.284928	0.669279	2.34894	0.425724
1421045_at	Mrc2	17534	5	860.47	265.855	624.522	0.308965	0.725792	2.34911	0.425693
1422835_at	Kcnd2	16508	5	64.907	17.281	40.5977	0.266242	0.625475	2.34927	0.425664
1417293_at	Hs6st1 /// LOC100047260	100047260 /// 50785	5	329.522	86.7516	204.694	0.263265	0.621185	2.35954	0.423812
1436190_at	Zfp618	72701	5	55.7203	16.5949	39.2113	0.297826	0.703717	2.36285	0.423218
1424159_at	Fam134c	67998	5	79.8589	24.7294	58.5702	0.309663	0.733421	2.36845	0.422218
1439827_at	Adamts12	239337	5	91.9151	26.8477	63.6686	0.292092	0.692689	2.37148	0.421678
1434148_at	Tcf4	21413	5	437.188	134.324	318.685	0.307245	0.728942	2.37251	0.421495
1436048_at	Exoc8	102058	5	249.182	77.1944	183.188	0.309791	0.735159	2.37308	0.421393
1438407_at	Dsel	319901	5	307.099	88.8895	211.188	0.289449	0.687689	2.37585	0.420901
1454995_at	Ddah1	69219	5	1371.63	415.855	989.208	0.303184	0.721193	2.37873	0.420392
1448876_at	Evc	59056	5	34.1172	8.66155	20.638	0.253876	0.604915	2.38272	0.419689
1422561_at	Adamts5 /// LOC100048332	100048332 /// 23794	5	591.522	172.244	410.522	0.291187	0.69401	2.38338	0.419572
1453208_at	2700089E24Rik	381820	5	395.188	111.2	265.271	0.281385	0.671252	2.38553	0.419194
1423091_a_at	Gpm6b	14758	5	599.522	151.958	362.894	0.253465	0.605305	2.38812	0.41874
1451833_a_at	Setdb1	84505	5	48.3563	15.4293	36.8877	0.319075	0.762831	2.39075	0.418278
1437324_x_at	Fmod	14264	5	78.8597	19.8391	47.512	0.251575	0.602487	2.39486	0.41756
1423368_at	Laptm4a	17775	5	3254.36	1004.52	2406.04	0.30867	0.73933	2.39521	0.417499
1433474_at	Edil3	13612	5	190.855	59.6101	142.855	0.312332	0.7485	2.39649	0.417277
1418415_at	Hoxb5	15413	5	44.9691	13.9915	33.5597	0.311135	0.746285	2.39859	0.416912
1424099_at	Gpx8	69590	5	1788.76	556.855	1338.02	0.311307	0.748015	2.40282	0.416178
1437279_x_at	Sdc1	20969	5	773.522	237.505	571.188	0.307043	0.738426	2.40496	0.415808
1437871_at	LOC100046963 /// Pgm5	100046963 /// 226041	5	957.704	270.855	654.172	0.282817	0.683063	2.41521	0.414043
1450008_a_at	Ctnnb1	12387	5	655.968	199.696	482.522	0.304429	0.735587	2.41628	0.413859
1419300_at	Flt1	14254	5	48.3563	13.886	33.5597	0.28716	0.694009	2.4168	0.41377
1435456_at	Ttc28	209683	5	107.522	27.8007	67.2748	0.258559	0.625686	2.4199	0.413241
1444232_at	Prkg1	19091	5	594.522	158.258	383.188	0.266194	0.644532	2.42129	0.413003
1428174_x_at	Khsrp	16549	5	243.855	66.4871	161.017	0.27265	0.660297	2.42178	0.41292
1427183_at	Efemp1	216616	5	282.956	73.2013	177.522	0.258702	0.627382	2.42512	0.412351
1417455_at	Tgfb3	21809	5	321.498	85.8463	208.188	0.26702	0.647558	2.42513	0.412349
1416136_at	Mmp2	17390	5	273.891	65.0696	157.855	0.237575	0.576343	2.42594	0.412211
1455940_x_at	Wdr6	83669	5	625.522	198.017	480.623	0.316562	0.768355	2.42718	0.412
1435937_at	Sptlc2	20773	5	94.1885	24.7006	59.9676	0.262247	0.636676	2.42778	0.4119
1418454_at	Mfap5	50530	5	204.322	59.6574	144.855	0.291978	0.708956	2.42812	0.411842
1417179_at	Tspan5	56224	5	791.855	217.774	529.397	0.275018	0.668553	2.43095	0.411362
1428510_at	Lphn1	330814	5	365.2	102.727	249.855	0.281289	0.68416	2.43223	0.411145
1434899_s_at	Tnrc6a	233833	5	86.8504	27.4071	66.8924	0.315567	0.770202	2.44069	0.40972
1435730_at	D930026N18Rik	619317	5	53.8659	13.6882	33.4362	0.254117	0.620731	2.4427	0.409383
1416302_at	Ebf1	13591	5	49.3005	14.7451	36.0941	0.299087	0.732125	2.44787	0.408519
1452843_at	Il6st	16195	5	1029.52	235.012	575.522	0.228273	0.559019	2.4489	0.408347
1434501_at	Ypel4	241525	5	53.1774	14.3493	35.2043	0.269839	0.662016	2.45338	0.407602
1437442_at	Pcdh7	54216	5	980.188	306.898	753.406	0.313101	0.768634	2.45491	0.407347
1420821_at	Sgpp1	81535	5	223.147	68.3471	167.855	0.306287	0.752218	2.45592	0.407179
1426275_a_at	Uxs1	67883	5	213.404	56.6947	139.251	0.265668	0.652523	2.45616	0.40714
1453771_at	Gulp1	70676	5	48.6229	12.6901	31.1689	0.26099	0.641033	2.45616	0.40714
1421662_a_at	Tusc3	80286	5	182.855	51.9896	127.749	0.284322	0.698635	2.4572	0.406967
1427680_a_at	Nfib	18028	5	149.855	38.4813	94.6832	0.25679	0.631832	2.4605	0.406422
1443881_at	Pofut1	140484	5	345.025	100.718	247.855	0.291914	0.718367	2.46089	0.406357
1435457_at	Pdzd4	245469	5	112.522	32.19	79.3193	0.286078	0.704925	2.4641	0.405828
1438682_at	Pik3r1	18708	5	539.87	136.522	336.79	0.252879	0.623836	2.46694	0.405361
1450663_at	Thbs2	21826	5	6694.86	2055.52	5073.86	0.30703	0.757874	2.4684	0.40512
1419993_at	Rab3il1	74760	5	66.9289	17.189	42.486	0.256825	0.634793	2.47169	0.404581
1428500_at	2210419D22Rik	73661	5	2174.52	548.507	1357.57	0.252242	0.624308	2.47503	0.404035
1425484_at	Tox	252838	5	36.6482	9.41841	23.3392	0.256995	0.636844	2.47804	0.403545
1426779_x_at	Dag1	13138	5	96.8613	29.9246	74.1991	0.308943	0.766035	2.47953	0.403302
1417282_at	Mmp23	26561	5	190.855	53.703	133.931	0.281381	0.70174	2.49391	0.400977
1442203_at	LOC552880	552880	5	53.4087	15.9321	39.8153	0.298305	0.745483	2.49906	0.40015
1436982_at	Tnrc6b	213988	5	243.855	66.4202	166.358	0.272376	0.6822	2.50463	0.399261
1455826_a_at	Bace1	23821	5	271.687	68.2199	170.915	0.251097	0.629089	2.50536	0.399144
1434288_at	Bivm	246229	5	55.1099	16.5123	41.5878	0.299626	0.754633	2.51859	0.397048
1436518_at	Usp46	69727	5	242.855	57.0526	143.855	0.234924	0.592349	2.52145	0.396598
1451990_at	Mapre2	212307	5	409.522	112.832	285.754	0.275521	0.697775	2.53257	0.394856
1452387_a_at	Amotl2	56332	5	780.281	229.255	582.522	0.293811	0.746554	2.54093	0.393556
1417853_at	Clca1	12722	5	49.4591	13.8535	35.2043	0.280099	0.711786	2.54119	0.393516
1435337_at	Tshz3	243931	5	888.682	254.375	647.188	0.286238	0.728256	2.54423	0.393046
1427086_at	Slit3	20564	5	850.201	179.188	455.942	0.21076	0.536275	2.54448	0.393007
1450637_a_at	Aebp1	11568	5	1071.52	310.721	790.855	0.289981	0.738067	2.54522	0.392893
1444302_at	Glt8d4 /// LOC100048436	100048436 /// 232313	5	74.1991	18.3625	46.7945	0.247476	0.630661	2.54838	0.392407
1452783_at	Fndc3b	72007	5	574.747	160.736	411.522	0.279664	0.716005	2.56023	0.390589
1435537_at	Ptprd	19266	5	124.056	31.1689	79.8445	0.251249	0.643616	2.56167	0.39037
1452664_a_at	Tm7sf3	67623	5	262.855	71.207	182.522	0.270898	0.694382	2.56325	0.390129
1460554_s_at	Glg1	20340	5	460.899	135.522	348.522	0.294037	0.756177	2.5717	0.388847
1423628_s_at	Pcdhga1 /// Pcdhga10 /// Pcdhga11 /// Pcdhga12 /// Pcdhga2 /// Pcdhga3 /// Pcdhga4 /// Pcdhga5 /// Pcdhga6 /// Pcdhga7 /// Pcdhga8 /// Pcdhga9 /// Pcdhgb1 /// Pcdhgb2 /// Pcdhgb4 /// Pcdhgb5 /// Pcdhgb6 /// Pcdhgb7 /// Pcdhgb8 /// Pcdhgc3 /// Pcdhgc4 /// Pcdhgc5	93699 /// 93700 /// 93701 /// 93702 /// 93703 /// 93704 /// 93705 /// 93706 /// 93707 /// 93708 /// 93709 /// 93710 /// 93711 /// 93712 /// 93713 /// 93714 /// 93715 /// 93716 /// 93717 /// 93722 /// 93723 /// 93724	5	517.048	132.019	339.522	0.255333	0.656654	2.57175	0.38884
1451566_at	Zfp810	235050	5	201.192	44.8544	115.522	0.222943	0.574185	2.57548	0.388277
1421977_at	Mmp19	58223	5	506.188	133.706	344.599	0.264142	0.680773	2.57729	0.388004
1457594_at	---	---	5	57.6721	13.9708	36.0606	0.242246	0.62527	2.58114	0.387426
1448883_at	Lgmn	19141	5	1105.64	286.308	740.855	0.258951	0.670066	2.58761	0.386456
1425493_at	Bmpr1a	12166	5	683.522	199.26	517.16	0.291519	0.756611	2.59541	0.385296
1427074_at	Pcmtd2	245867	5	131.632	35.8384	93.1886	0.272263	0.707949	2.60024	0.384579
1452296_at	Slit3	20564	5	286.775	70.8132	184.188	0.24693	0.642276	2.60104	0.384461
1418470_at	Yes1	22612	5	79.7741	21.4038	55.7203	0.268305	0.698475	2.60329	0.384129
1454901_at	Ypel2	77864	5	658.823	185.204	482.522	0.281113	0.732399	2.60536	0.383825
1456195_x_at	Itgb5	16419	5	656.855	177.167	462.149	0.269719	0.703579	2.60856	0.383354
1424198_at	Dlg5	71228	5	462.484	131.522	344.001	0.284381	0.743812	2.61554	0.38233
1424133_at	Tmem98	103743	5	524.188	112.109	293.522	0.213872	0.559955	2.61817	0.381945
1437132_x_at	Nedd9	18003	5	704.466	187.522	490.965	0.26619	0.696932	2.61818	0.381945
1426756_at	Galnt2	108148	5	54.7489	15.3608	40.2602	0.280569	0.735361	2.62097	0.381539
1428562_at	2210403K04Rik	67098	5	275.855	75.442	197.857	0.273484	0.71725	2.62264	0.381296
1430533_a_at	Ctnnb1	12387	5	141.522	32.1906	84.5231	0.22746	0.597245	2.62571	0.380849
1436819_at	41158	56526	5	174.522	39.0636	102.836	0.223832	0.589247	2.63254	0.379861
1455669_at	Wdr19	213081	5	123.465	35.0126	92.1886	0.283582	0.746676	2.63301	0.379793
1450040_at	Timp2	21858	5	239.222	55.1577	145.855	0.230571	0.609706	2.64433	0.378168
1454876_at	Rab23	19335	5	159.686	39.7966	105.522	0.249218	0.660806	2.65152	0.377142
1416598_at	Glis2	83396	5	108.496	30.3928	80.7335	0.280129	0.744117	2.65634	0.376458
1446791_at	Pi15	94227	5	59.3132	15.1382	40.264	0.255225	0.678838	2.65977	0.375973
1460629_at	Trim16	94092	5	147.855	35.1034	93.567	0.237417	0.632829	2.66547	0.375168
1452769_at	Rnf145	74315	5	501.701	127.748	341.522	0.254631	0.680727	2.67339	0.374057
1459304_at	---	---	5	40.6974	9.9349	26.5628	0.244116	0.652689	2.67368	0.374016
1434520_at	Sc5d	235293	5	96.0423	20.4472	54.7489	0.212898	0.57005	2.67758	0.373472
1425475_at	Col4a5	12830	5	337.901	78.4241	210.188	0.232092	0.622041	2.68015	0.373114
1434891_at	Ptgfrn	19221	5	290.612	65.8049	177.522	0.226436	0.610855	2.6977	0.370686
1424407_s_at	Cbx6	494448	5	1182.09	273.855	739.188	0.231669	0.625321	2.6992	0.370481
1427257_at	Vcan	13003	5	268.855	56.9707	153.855	0.211901	0.57226	2.7006	0.370288
1450105_at	Adam10	11487	5	193.264	49.3658	133.522	0.255431	0.690876	2.70474	0.369721
1416687_at	Plod2	26432	5	240.855	45.8641	124.525	0.190422	0.51701	2.71508	0.368314
1444089_at	Spnb2	20742	5	1472.35	371.22	1010.52	0.252127	0.686332	2.72216	0.367355
1435293_at	Adam22	11496	5	92.4224	18.2403	49.9497	0.197358	0.540451	2.73843	0.365172
1417937_at	Dact1	59036	5	72.8522	15.8673	43.4673	0.217802	0.59665	2.73942	0.365041
1432129_a_at	Prrx1	18933	5	158.855	41.8078	114.595	0.263182	0.72138	2.74099	0.364831
1418990_at	Ms4a4d	66607	5	267.308	56.6947	155.523	0.212095	0.581811	2.74316	0.364543
1424762_at	C1qtnf5 /// Mfrp	235312 /// 259172	5	56.6947	13.4451	36.8877	0.237149	0.650637	2.74358	0.364487
1457042_at	AI256396	58871	5	174.144	33.4741	92.1886	0.19222	0.529381	2.75403	0.363104
1455741_a_at	Ece1	230857	5	425.778	107.522	296.573	0.25253	0.696545	2.75826	0.362547
1426755_at	Ckap4	216197	5	249.522	62.5229	173.522	0.250571	0.695417	2.77533	0.360317
1427233_at	Tshz1	110796	5	238.013	60.289	167.855	0.253302	0.705236	2.78417	0.359173
1416427_at	Ccni	12453	5	847.522	215.631	600.855	0.254426	0.708955	2.78649	0.358874
1450418_a_at	Yipf4	67864	5	874.006	228.824	642.855	0.26181	0.735527	2.80939	0.355949
1460559_at	Kank2	235041	5	757.296	196.522	552.188	0.259505	0.729158	2.80981	0.355896
1425527_at	Prrx1	18933	5	79.326	15.1024	42.486	0.190384	0.535587	2.8132	0.355467
1447845_s_at	Vnn1	22361	5	52.3499	11.3586	31.9555	0.216974	0.610422	2.81334	0.355449
1434415_at	Dact3	629378	5	52.272	13.3811	37.7435	0.25599	0.722059	2.82065	0.354528
1448383_at	Mmp14	17387	5	529.065	130.408	367.855	0.246488	0.695293	2.82079	0.354511
1418824_at	Arf6	11845	5	194.005	49.4135	139.522	0.254702	0.719164	2.82355	0.354164
1438042_at	Shox2	20429	5	337.723	72.5436	205.188	0.214802	0.607565	2.82849	0.353546
1435320_at	Ctdspl2	329506	5	156.116	38.9416	110.375	0.24944	0.707006	2.83438	0.352811
1453103_at	Ablim1	226251	5	51.7968	9.60374	27.2443	0.185412	0.525985	2.83685	0.352504
1433968_a_at	Megf9	230316	5	69.9011	12.9953	36.8877	0.185909	0.527713	2.83855	0.352292
1456532_at	Pdgfd	71785	5	602.734	115.522	328.273	0.191663	0.54464	2.84165	0.351908
1457058_at	Adamts2	216725	5	432.188	84.678	240.945	0.195928	0.557499	2.84542	0.351442
1429314_at	Syt11	229521	5	41.5878	8.97971	25.5808	0.215922	0.615105	2.84874	0.351032
1426569_a_at	Frk	14302	5	206.349	51.5233	147.614	0.24969	0.71536	2.86499	0.349042
1435133_at	Ugcg	22234	5	1795.69	360.927	1034.86	0.200997	0.5763	2.86721	0.348771
1451332_at	Zfp521	225207	5	99.4376	22.604	64.907	0.227319	0.652741	2.87148	0.348253
1452690_at	Khsrp	16549	5	166.078	38.0768	109.522	0.22927	0.659458	2.87634	0.347664
1437473_at	Maf	17132	5	228.188	52.784	151.855	0.231318	0.665481	2.87692	0.347595
1426778_at	Dag1	13138	5	411.985	94.1885	271.569	0.228621	0.659173	2.88325	0.34683
1452828_at	Fbxo21	231670	5	235.174	52.8168	152.291	0.224586	0.647566	2.88338	0.346816
1448933_at	Pcdhb17	93888	5	58.22	12.6901	36.7316	0.217968	0.630911	2.89451	0.345482
1452330_a_at	Mxra8	74761	5	428.223	97.7213	284.188	0.228202	0.663645	2.90815	0.343861
1428432_at	Zcchc24	71918	5	230.417	50.4902	146.855	0.219125	0.637343	2.90859	0.34381
1434639_at	Klhl29	208439	5	43.7348	8.38705	24.4049	0.191771	0.558021	2.90983	0.343662
1448891_at	Fcrls	80891	5	1665.86	380.313	1108.12	0.228299	0.665197	2.91371	0.343205
1437289_at	Impad1	242291	5	581.754	111.522	325.15	0.191699	0.558913	2.91558	0.342985
1429273_at	Bmper	73230	5	524.829	118.855	347.009	0.226464	0.661185	2.9196	0.342513
1450437_a_at	Ncam1	17967	5	114.522	20.2828	59.331	0.177108	0.518077	2.92519	0.341858
1429315_at	Syt11	229521	5	72.9919	14.5187	42.486	0.198908	0.582065	2.92631	0.341728
1429987_at	9930013L23Rik	80982	5	229.906	56.1989	164.855	0.244443	0.717055	2.93342	0.340899
1450380_at	Epdr1	105298	5	106.522	21.9839	64.4975	0.206379	0.605487	2.93385	0.340849
1456603_at	Fam101b	76566	5	332.522	81.0903	238.192	0.243865	0.716321	2.93737	0.340441
1434479_at	Col5a1	12831	5	1729.19	410.999	1209.35	0.237683	0.699372	2.94245	0.339853
1426368_at	LOC100044115 /// Rin2	100044115 /// 74030	5	1039.9	175.855	519.522	0.169108	0.499589	2.95426	0.338494
1448477_at	Chst12	59031	5	75.1972	16.291	48.132	0.216644	0.640076	2.95451	0.338466
1448989_a_at	Myo1b	17912	5	52.15	10.7987	32.0007	0.207071	0.613628	2.96338	0.337453
1437003_at	---	---	5	94.639	16.3691	48.6218	0.172963	0.513761	2.97034	0.336661
1421087_at	Per3	18628	5	143.786	29.4534	87.5224	0.204842	0.6087	2.97155	0.336524
1456070_at	Ptprg	19270	5	155.379	30.31	90.1888	0.195071	0.580443	2.97555	0.336073
1418599_at	Col11a1	12814	5	381.75	66.6708	199.188	0.174645	0.521777	2.98764	0.334712
1435345_at	Cercam	99151	5	280.666	58.3392	174.522	0.20786	0.621812	2.9915	0.33428
1458406_at	---	---	5	82.2162	19.2697	57.6721	0.234378	0.701468	2.99289	0.334125
1417143_at	Lpar1	14745	5	1737.86	334.445	1004.52	0.192447	0.578024	3.00355	0.33294
1418755_at	Tbx15	21384	5	256.191	57.1663	172.522	0.22314	0.673412	3.01789	0.331357
1420170_at	Myh9	17886	5	83.5234	17.995	54.5217	0.215449	0.652771	3.02982	0.330052
1459749_s_at	Fat4	329628	5	602.681	99.486	302.188	0.165073	0.501407	3.0375	0.329219
1448606_at	Lpar1	14745	5	870.928	150.855	460.452	0.173212	0.528692	3.05228	0.327624
1426246_at	Pros1	19128	5	3404.52	754.488	2303.9	0.221614	0.676717	3.05359	0.327484
1439790_at	Serpinb9	20723	5	84.5231	16.6063	50.7105	0.196471	0.599961	3.05369	0.327473
1416368_at	Gsta4	14860	5	95.1885	22.1868	67.7576	0.233083	0.711826	3.05396	0.327444
1438784_at	Bcl11b	58208	5	108.522	24.4038	75.0217	0.224875	0.691306	3.07418	0.32529
1415939_at	Fmod	14264	5	54.1695	12.2507	37.7435	0.226155	0.696766	3.08092	0.324579
1451004_at	Acvr2a	11480	5	144.849	24.699	76.1957	0.170516	0.526037	3.08497	0.324153
1428431_at	Zcchc24	71918	5	1000.22	211.424	653.855	0.211377	0.653711	3.09263	0.323349
1426880_at	Etl4	208618	5	555.855	106.487	331.188	0.191573	0.595818	3.11014	0.321529
1434102_at	Nfib	18028	5	1512.69	338.188	1051.86	0.223568	0.695355	3.11026	0.321516
1442005_at	AW987390	100467	5	209.188	47.6746	148.853	0.227903	0.711573	3.12227	0.32028
1429313_at	Ror1	26563	5	51.204	8.88263	27.7968	0.173475	0.542863	3.12934	0.319556
1417789_at	Ccl11	20292	5	115.591	17.5622	55.2186	0.151934	0.477705	3.14417	0.318049
1433759_at	Dpy19l1	244745	5	2140.24	460.522	1452.71	0.215173	0.678759	3.15448	0.317009
1455607_at	Rspo3	72780	5	152.459	29.295	93.1886	0.192149	0.611235	3.18104	0.314362
1417389_at	Gpc1	14733	5	738.855	161.094	513.282	0.218033	0.694699	3.18621	0.313852
1438530_at	Tfpi	21788	5	371.855	80.2949	255.983	0.215931	0.688394	3.18803	0.313673
1425326_at	Acly	104112	5	93.1886	20.7169	66.183	0.222312	0.710205	3.19464	0.313025
1416572_at	Mmp14	17387	5	96.1885	15.8764	50.7263	0.165055	0.527364	3.19507	0.312982
1457682_at	9030420J04Rik	71544	5	274.611	59.7411	191.188	0.217548	0.696214	3.20028	0.312473
1422243_at	Fgf7	14178	5	66.8924	13.2984	42.6088	0.198803	0.636975	3.20405	0.312105
1459679_s_at	Myo1b	17912	5	138.673	30.3928	98.1884	0.219168	0.708055	3.23065	0.309535
1446951_at	P4ha3	320452	5	228.188	34.8319	112.7	0.152646	0.493889	3.23553	0.309068
1420988_at	Polh	80905	5	62.4373	9.93907	32.2222	0.159185	0.516073	3.24197	0.308454
1452244_at	6330406I15Rik	70717	5	65.1555	9.35327	30.4082	0.143553	0.466702	3.25107	0.307591
1455288_at	1110036O03Rik	66180	5	275.409	56.9916	185.355	0.206935	0.673019	3.25232	0.307473
1418533_s_at	Fzd2	57265	5	91.838	14.6686	47.7295	0.159722	0.519714	3.25386	0.307327
1421965_s_at	Notch3	18131	5	239.377	46.0545	149.855	0.192393	0.62602	3.25386	0.307327
1416319_at	Adk	11534	5	173.512	37.221	121.522	0.214516	0.700366	3.26487	0.306291
1445247_at	C530044C16Rik	319981	5	42.8332	6.67623	21.8985	0.155866	0.511251	3.28007	0.304871
1448259_at	Fstl1	14314	5	2643.36	554.332	1822.97	0.209708	0.689642	3.28858	0.304082
1451691_at	Ednra	13617	5	46.7945	7.60904	25.0737	0.162605	0.535825	3.29525	0.303467
1423484_at	Bicc1	83675	5	145.188	26.0957	86.0445	0.179737	0.59264	3.29726	0.303282
1444761_at	---	---	5	68.8375	13.1109	43.3919	0.190462	0.630352	3.3096	0.302151
1433442_at	Klhl9	242521	5	1420.36	286.063	952.522	0.201402	0.670622	3.32976	0.300322
1416796_at	LOC100044475 /// Nck2	100044475 /// 17974	5	889.855	162.847	546.761	0.183004	0.614438	3.35751	0.29784
1429538_a_at	Sfrs18	66625	5	194.522	35.9022	121.331	0.184566	0.623742	3.3795	0.295902
1440668_at	Adamtsl3	269959	5	92.4255	13.7985	46.7945	0.149293	0.506294	3.39127	0.294875
1449583_at	Pcdhb20	93891	5	50.7134	9.60374	32.7525	0.189373	0.645836	3.41039	0.293221
1454617_at	Arrdc3	105171	5	136.503	27.5752	94.1218	0.202012	0.689522	3.41327	0.292974
1448647_at	Man2a1	17158	5	971.62	171.522	593.522	0.176532	0.610858	3.46033	0.28899
1455626_at	Hoxa9	15405	5	36.0412	7.04013	24.4049	0.195336	0.677139	3.46654	0.288472
1417574_at	Cxcl12	20315	5	595.47	104.368	363.522	0.175271	0.610479	3.48306	0.287104
1448475_at	Olfml3	99543	5	305.729	53.4794	187.522	0.174924	0.61336	3.50643	0.285191
1428332_at	Pik3ip1	216505	5	152.52	25.4182	89.1889	0.166655	0.584768	3.50885	0.284993
1428967_at	Igf1r	16001	5	908.188	173.549	609.011	0.191094	0.670578	3.50915	0.284969
1417355_at	Peg3	18616	5	88.591	11.5076	40.6974	0.129895	0.459385	3.53658	0.282759
1427084_a_at	Map4k5	399510	5	263.188	43.2458	153.177	0.164315	0.582006	3.54201	0.282326
1424711_at	Tmem2	83921	5	270.054	38.3921	136.522	0.142164	0.505534	3.55598	0.281216
1455426_at	Epha3	13837	5	84.9798	15.1382	53.839	0.178139	0.633551	3.5565	0.281175
1450658_at	Adamts5 /// LOC100048332	100048332 /// 23794	5	230.143	41.7398	148.855	0.181365	0.646794	3.56626	0.280405
1423394_at	Pcyox1	66881	5	449.88	76.1957	271.855	0.169369	0.604283	3.56785	0.280281
1417185_at	Ly6a	110454	5	2325.69	350.162	1251.77	0.150563	0.538237	3.57483	0.279734
1431691_a_at	Rab31	106572	5	384.593	63.9807	229.188	0.166359	0.595924	3.58215	0.279162
1438870_at	Fbn1	14118	5	158.855	23.5097	84.5231	0.147995	0.532077	3.59524	0.278145
1429097_at	C030044C12Rik	77483	5	376.555	56.8114	208.188	0.150871	0.552876	3.66455	0.272885
1436826_at	Tmtc3	237500	5	361.855	64.5257	236.679	0.178319	0.65407	3.66798	0.27263
1416221_at	Fstl1	14314	5	1825.26	314.62	1155.19	0.17237	0.63289	3.6717	0.272354
1441679_at	---	---	5	73.6543	11.5238	42.3804	0.156458	0.575396	3.67764	0.271913
1455627_at	Col8a1	12837	5	1551.59	262.648	971.188	0.169276	0.62593	3.69768	0.27044
1429178_at	Odz3	23965	5	152.981	19.7238	72.9687	0.128929	0.476978	3.69953	0.270305
1431475_a_at	Hoxa10	15395	5	233.278	33.5353	124.522	0.143757	0.53379	3.71315	0.269313
1416741_at	Col5a1	12831	5	1015.52	177.617	661.995	0.174903	0.651876	3.72708	0.268307
1450652_at	Ctsk	13038	5	228.188	38.4498	143.397	0.1685	0.628413	3.72945	0.268136
1422466_at	Nxn	18230	5	80.2414	13.277	49.6379	0.165463	0.618607	3.73864	0.267477
1451132_at	LOC100046056 /// Pbxip1	100046056 /// 229534	5	186.188	27.2715	102.197	0.146472	0.548888	3.74738	0.266853
1439565_at	Fam123b	72345	5	187.785	33.0874	125.522	0.176198	0.668434	3.79365	0.263599
1424186_at	Ccdc80	67896	5	559.968	97.6329	371.855	0.174355	0.664065	3.80871	0.262556
1452589_at	Ptk7	71461	5	98.1884	14.5623	55.8284	0.14831	0.568584	3.83377	0.26084
1418176_at	Vdr	22337	5	146.927	17.7904	68.2199	0.121083	0.464311	3.83465	0.26078
1424187_at	Ccdc80	67896	5	169.522	24.5941	94.5863	0.145079	0.55796	3.8459	0.260017
1419182_at	Svep1	64817	5	161.006	27.4124	106.522	0.170257	0.661599	3.88589	0.257341
1436713_s_at	Meg3	17263	5	256.522	42.7701	167.728	0.166731	0.653853	3.9216	0.254998
1459909_at	Nfix	18032	5	107.801	13.6882	54.2501	0.126976	0.503242	3.96327	0.252317
1433924_at	---	---	5	1488.52	180.037	716.415	0.12095	0.481293	3.97926	0.251303
1455566_s_at	Spats2l	67198	5	226.276	23.8104	95.1885	0.105227	0.420675	3.99777	0.250139
1417462_at	Cap1	12331	5	335.691	53.0761	212.188	0.15811	0.632094	3.99782	0.250137
1438236_at	Nfia	18027	5	117.509	14.1785	56.6947	0.120659	0.48247	3.99863	0.250085
1422912_at	Bmp4	12159	5	194.865	24.2548	97.1884	0.12447	0.498748	4.00697	0.249565
1448669_at	Dkk3	50781	5	265.188	26.3224	105.607	0.0992592	0.398233	4.01206	0.249249
1454834_at	Nfib	18028	5	606.855	93.3622	377.009	0.153846	0.621251	4.03813	0.247639
1424086_at	Oaf	102644	5	137.522	22.5052	90.9688	0.163648	0.661487	4.04213	0.247394
1436029_at	Bicc1	83675	5	576.299	72.2039	294.596	0.125289	0.511186	4.08006	0.245095
1454709_at	Tmem64	100201	5	626.731	78.806	325.522	0.125741	0.519397	4.13067	0.242091
1442063_at	Adamtsl1	77739	5	145.855	18.9941	78.5083	0.130226	0.538262	4.1333	0.241937
1448818_at	Wnt5a	22418	5	777.531	100.188	414.522	0.128854	0.533125	4.13742	0.241696
1450716_at	Adamts1	11504	5	1004.43	133.522	555.018	0.132933	0.552572	4.15676	0.240572
1416414_at	Emilin1	100952	5	109.522	14.2275	59.9128	0.129906	0.547041	4.21106	0.23747
1452751_at	Ebf3	13593	5	162.839	25.0033	105.522	0.153547	0.648013	4.2203	0.23695
1425515_at	Pik3r1	18708	5	306.522	39.2187	166.648	0.127948	0.543675	4.2492	0.235339
1456087_at	Nfia	18027	5	267.855	30.8531	131.812	0.115186	0.492101	4.27224	0.234069
1434667_at	Col8a2	329941	5	176.188	23.7427	102.121	0.134758	0.579611	4.30114	0.232497
1456080_a_at	Serinc3	26943	5	206.867	24.2998	105.522	0.117466	0.510095	4.3425	0.230282
1451939_a_at	Rpgr /// Srpx	19893 /// 51795	5	71.3032	9.11305	39.8153	0.127807	0.558394	4.36904	0.228883
1441137_at	Bicc1	83675	5	494.522	67.9729	302.188	0.137452	0.611072	4.44572	0.224936
1426947_x_at	Col6a2	12834	5	373.398	49.8579	223.188	0.133525	0.597723	4.47649	0.223389
1428896_at	Pdgfrl	68797	5	488.195	58.7261	263.188	0.120292	0.539105	4.48162	0.223133
1453186_at	Sfrs18	66625	5	132.522	16.2683	72.9433	0.122759	0.550425	4.48378	0.223026
1416102_at	Ywhaz	22631	5	1497.37	210.188	958.371	0.140372	0.640036	4.55958	0.219318
1418532_at	Fzd2	57265	5	128.378	13.397	61.9384	0.104357	0.48247	4.62328	0.216296
1421964_at	Notch3	18131	5	232.514	29.5926	138.522	0.127272	0.595756	4.68096	0.213631
1436319_at	Sulf1	240725	5	539.617	56.3589	265.855	0.104442	0.492673	4.71718	0.211991
1452366_at	Csgalnact1	234356	5	1189.69	108.499	512.522	0.0911996	0.430803	4.72374	0.211697
1453071_s_at	Kdelc2	68304	5	1027	134.522	641.855	0.130986	0.624983	4.77139	0.209583
1416211_a_at	Ptn	19242	5	2874.52	246.34	1179.25	0.0856978	0.410241	4.78707	0.208896
1449113_at	Gpbp1l1	77110	5	214.198	26.0801	125.522	0.121757	0.586007	4.81294	0.207773
1419663_at	Ogn	18295	5	1442.86	172.98	833.188	0.119887	0.577458	4.81668	0.207612
1439774_at	Prrx1	18933	5	457.061	58.2711	281.188	0.127491	0.615209	4.82552	0.207232
1440926_at	Flt1	14254	5	259.924	24.4964	121.522	0.0942445	0.467527	4.96079	0.201581
1417356_at	Peg3	18616	5	155.529	11.1967	55.5928	0.0719912	0.357444	4.96511	0.201405
1449297_at	Casp12	12364	5	157.992	15.8673	79.0255	0.100432	0.500188	4.98039	0.200788
1417404_at	Elovl6	170439	5	136.977	15.23	76.1957	0.111187	0.556267	5.00301	0.19988
1437284_at	Fzd1	14362	5	1452.79	159.011	796.188	0.109452	0.548042	5.00713	0.199715
1417644_at	Sspn	16651	5	128.292	14.1149	71.207	0.110022	0.555038	5.0448	0.198224
1417359_at	Mfap2	17150	5	139.618	13.866	70.2106	0.0993139	0.502878	5.06352	0.197491
1450112_a_at	Gas2	14453	5	318.855	24.1311	122.761	0.0756805	0.385006	5.08725	0.19657
1424807_at	Lama4	16775	5	386.855	29.299	149.183	0.0757364	0.385631	5.09175	0.196396
1460440_at	Lphn3	319387	5	291.522	31.8033	161.963	0.109094	0.555576	5.09263	0.196362
1454984_at	Lifr	16880	5	186.063	16.413	84.5231	0.0882121	0.454271	5.14976	0.194184
1419062_at	Epb4.1l3	13823	5	960.619	104.889	543.188	0.109189	0.565456	5.17868	0.1931
1448842_at	Cdo1	12583	5	330.522	25.8418	135.851	0.078185	0.411019	5.257	0.190222
1454830_at	Fbn2	14119	5	1276.86	140.281	745.091	0.109864	0.583536	5.31144	0.188273
1437673_at	---	---	5	403.029	29.295	156.009	0.0726869	0.38709	5.32545	0.187778
1449154_at	Col11a1	12814	5	417.723	42.4316	231.188	0.101578	0.553449	5.4485	0.183537
1441955_s_at	LOC676674 /// Paip1	218693 /// 676674	5	175.188	16.3839	91.0101	0.0935218	0.519499	5.55484	0.180023
1456084_x_at	Fmod	14264	5	406.619	43.7252	245.479	0.107534	0.603708	5.61413	0.178122
1434458_at	Fst	14313	5	1357.86	102.923	580.003	0.0757983	0.427147	5.63531	0.177453
1432592_at	Pappa	18491	5	146.855	15.0368	87.4222	0.102392	0.595296	5.81388	0.172002
1438658_a_at	S1pr3	13610	5	728.336	71.8324	419.855	0.0986254	0.576458	5.84493	0.171089
1443173_at	Ptn	19242	5	103.09	6.89389	40.6974	0.0668728	0.394777	5.9034	0.169394
1450377_at	LOC640441 /// Thbs1	21825 /// 640441	5	814.188	50.1089	300.188	0.0615446	0.368696	5.99072	0.166925
1450784_at	Reck	53614	5	230.188	17.7781	107.522	0.077233	0.467103	6.04797	0.165345
1415978_at	Tubb3	22152	5	177.312	14.0253	86.5226	0.0790996	0.487967	6.16902	0.1621
1434411_at	Col12a1	12816	5	3456.19	299.923	1880.52	0.0867787	0.544103	6.27001	0.159489
1418603_at	Avpr1a	54140	5	202.188	18.1083	113.916	0.0895614	0.563417	6.29084	0.158961
1418981_at	Casp12	12364	5	134.522	11.1286	70.7114	0.0827271	0.52565	6.35403	0.157381
1418156_at	Kcne4	57814	5	295.052	15.7954	100.522	0.0535343	0.340691	6.36397	0.157135
1437785_at	Adamts9	101401	5	403.522	27.098	173.145	0.0671537	0.429086	6.3896	0.156504
1458019_at	---	---	5	305.527	27.2008	175.522	0.0890292	0.574489	6.45282	0.154971
1460344_at	2310033F14Rik /// LOC100046056 /// Pbxip1	100046056 /// 229534 /// 69555	5	588.855	49.1214	317.01	0.0834185	0.538349	6.45359	0.154952
1456786_at	Ldb2	16826	5	99.3232	8.5783	56.6947	0.0863676	0.570811	6.60909	0.151307
1449335_at	Timp3	21859	5	2693.64	218.815	1456.19	0.0812339	0.540603	6.6549	0.150265
1450058_at	Asph	65973	5	261.656	20.638	139.345	0.0788746	0.53255	6.75185	0.148107
1426937_at	6330406I15Rik	70717	5	179.855	11.7394	79.346	0.0652716	0.441167	6.75894	0.147952
1440920_at	Mmp14	17387	5	297.522	24.437	167.855	0.0821352	0.564177	6.86889	0.145584
1448950_at	Il1r1	16177	5	746.381	41.8934	301.188	0.0561287	0.403532	7.18939	0.139094
1419662_at	Ogn	18295	5	539.188	30.0791	217.522	0.0557859	0.403424	7.23166	0.138281
1416652_at	Aspn	66695	5	2984.73	199.298	1446.19	0.0667725	0.484529	7.25641	0.137809
1460574_at	Fat4	329628	5	263.838	14.1149	103.157	0.0534985	0.390986	7.30835	0.13683
1434089_at	Synpo	104027	5	613.522	45.4851	336.522	0.0741377	0.548508	7.39851	0.135162
1448421_s_at	Aspn	66695	5	1127.52	76.3295	573.855	0.0676967	0.508953	7.51813	0.133012
1421917_at	Pdgfra	18595	5	813.188	44.807	338.528	0.0551004	0.416297	7.55525	0.132358
1447508_at	---	---	5	383.188	25.2749	197.91	0.0659594	0.516482	7.83029	0.127709
1455090_at	Angptl2	26360	5	321.522	16.5161	129.528	0.0513684	0.402859	7.84254	0.12751
1442977_at	---	---	5	279.183	18.975	149.855	0.0679663	0.536763	7.89748	0.126623
1438954_x_at	Figf	14205	5	592.514	21.2618	174.91	0.035884	0.295199	8.22648	0.121559
1438953_at	Figf /// LOC100047108	100047108 /// 14205	5	560.188	18.2556	165.525	0.0325883	0.295482	9.06711	0.110289
1452114_s_at	Igfbp5	16011	5	989.223	38.7	388.855	0.0391216	0.393091	10.0479	0.0995229
1449334_at	Timp3	21859	5	1908.86	94.1669	955.522	0.0493315	0.500572	10.1471	0.0985502
1448395_at	Sfrp1	20377	5	568.522	14.6763	151.855	0.0258148	0.267105	10.347	0.0966466
1421163_a_at	Nfia	18027	5	411.188	12.2194	137.522	0.0297172	0.334449	11.2544	0.0888541
1428136_at	Sfrp1	20377	5	1659.67	45.5583	554.079	0.0274502	0.333849	12.162	0.0822235
1429679_at	Lrrc17	74511	5	385.798	13.7787	171.522	0.0357148	0.444589	12.4483	0.0803322
1426852_x_at	Nov	18133	5	1560.19	33.8256	486.589	0.0216805	0.311879	14.3852	0.0695157
1448494_at	Gas1	14451	5	387.741	8.48355	130.522	0.0218794	0.336621	15.3853	0.0649972
1427298_at	Dnm3os	474332	5	905.616	24.4385	388.855	0.0269855	0.429382	15.9116	0.0628473
1452382_at	Dnm3os	474332	5	836.76	17.5622	300.514	0.0209884	0.35914	17.1114	0.0584406
1426851_a_at	Nov	18133	5	1365.19	23.313	411.347	0.0170768	0.301311	17.6445	0.0566748
1418511_at	Dpt	56429	5	1060.19	15.0277	327.378	0.0141746	0.308792	21.7849	0.0459033
1436058_at	Rsad2	58185	6	6.34988	2742.24	513.522	431.858	80.8711	0.187263	5.34008
1449025_at	Ifit3	15959	6	43.8447	2860.61	651.188	65.2442	14.8521	0.227639	4.39291
1418126_at	Ccl5	20304	6	11.1967	2208.21	520.526	197.22	46.4893	0.235723	4.24227
1449984_at	Cxcl2	20310	6	10.0166	788.855	203.188	78.7551	20.2852	0.257574	3.88238
1418930_at	Cxcl10	15945	6	9.93907	4321.05	1195.73	434.754	120.306	0.276723	3.61373
1450783_at	Ifit1	15957	6	7.6487	2983.81	960.188	390.108	125.536	0.321799	3.10753
1422029_at	Ccl20	20297	6	12.2139	390.855	130.295	32.0008	10.6677	0.333358	2.99978
1427381_at	Irg1	16365	6	11.8227	713.019	334.522	60.3091	28.2948	0.469162	2.13146
1423289_a_at	1810029B16Rik	66282	6	48.6337	297.855	154.493	6.12446	3.17668	0.518687	1.92795
1416298_at	Mmp9	17395	6	39.9682	328.522	172.496	8.21957	4.31584	0.525069	1.90451
1421262_at	Lipg	16891	6	15.7336	104.188	54.8616	6.62203	3.48691	0.526561	1.89911
1419282_at	Ccl12	20293	6	31.9582	306.998	170.522	9.60625	5.33578	0.555449	1.80035
1423954_at	C3	12266	6	49.8127	452.467	253.522	9.08335	5.0895	0.56031	1.78473
1434372_at	AW112010	107350	6	19.3807	170.983	100.522	8.82232	5.18669	0.587906	1.70095
1434015_at	Slc2a6	227659	6	18.4267	124.689	75.1972	6.76675	4.08089	0.60308	1.65816
1420380_at	Ccl2	20296	6	848.522	3996.55	2525.49	4.71002	2.97634	0.631918	1.58248
1416296_at	Il2rg	16186	6	17.8919	113.58	73.2013	6.3481	4.09131	0.644494	1.55161
1448995_at	Pf4	56744	6	68.8276	282.833	184.188	4.1093	2.67608	0.651226	1.53557
1416295_a_at	Il2rg	16186	6	54.0293	288.61	189.188	5.34172	3.50159	0.655517	1.52551
1421228_at	Ccl7	20306	6	425.835	1683.91	1104.19	3.95438	2.59299	0.655727	1.52503
1418465_at	Ncf4	17972	6	126.757	400.188	271.069	3.15713	2.1385	0.677354	1.47633
1420330_at	Clec4e	56619	6	9.19277	303.206	207.188	32.9831	22.5382	0.683326	1.46343
1453282_at	Cxadr	13052	6	8.48525	27.5752	18.975	3.24978	2.23624	0.688119	1.45324
1417688_at	Fam20c	80752	6	148.89	449.855	312.057	3.02139	2.09589	0.693682	1.44158
1448306_at	Nfkbia	18035	6	72.9125	709.855	497.614	9.73571	6.82481	0.701008	1.42652
1452279_at	Cfp	18636	6	127.914	774.009	545.188	6.051	4.26214	0.70437	1.41971
1417936_at	Ccl9	20308	6	707.188	2195.85	1556.47	3.10505	2.20093	0.708823	1.41079
1444009_at	Rassf4	213391	6	15.4568	54.7489	40.4763	3.54206	2.61868	0.739308	1.35262
1431843_a_at	Nfkbie	18037	6	21.5331	129.2	96.1885	6.00007	4.467	0.744491	1.3432
1422041_at	Pilrb1	170741	6	11.8645	59.3023	45.041	4.99828	3.79627	0.759516	1.31663
1417193_at	Sod2	20656	6	235.936	808.31	621.188	3.42597	2.63287	0.768503	1.30123
1443827_x_at	Fam20c	80752	6	71.0491	257.522	198.738	3.62456	2.79719	0.771733	1.29579
1428735_at	Cd69	12515	6	11.151	159.755	124.522	14.3266	11.1669	0.779454	1.28295
1420088_at	Nfkbia	18035	6	1231.11	4551.55	3577.52	3.6971	2.90593	0.786001	1.27226
1450826_a_at	Saa3	20210	6	559.188	2469.4	1945.19	4.41605	3.47859	0.787716	1.26949
1438157_s_at	Nfkbia	18035	6	216.932	1061.19	842.345	4.8918	3.88299	0.793776	1.2598
1420089_at	Nfkbia	18035	6	1158.49	4562.14	3663.69	3.93801	3.16247	0.803063	1.24523
1458299_s_at	Nfkbie	18037	6	21.2332	151.335	122.188	7.12727	5.7546	0.807406	1.23853
1448610_a_at	Sod2	20656	6	320.419	1019.86	836.447	3.18288	2.61048	0.820163	1.21927
1421366_at	Clec5a	23845	6	47.3401	158.889	132.522	3.35634	2.79936	0.83405	1.19897
1452754_at	Creld2	76737	6	178.368	812.188	680.522	4.55345	3.81527	0.837887	1.19348
1449731_s_at	Nfkbia	18035	6	661.492	2312.86	1944.82	3.49642	2.94006	0.840876	1.18924
1421410_a_at	Pstpip2	19201	6	21.0707	72.2039	62.2761	3.42675	2.95558	0.862503	1.15942
1419132_at	Tlr2	24088	6	163.855	757.806	664.522	4.62486	4.05555	0.876902	1.14038
1427327_at	Pilra	231805	6	27.0828	118.855	117.964	4.38857	4.35567	0.992504	1.00755
1448185_at	Herpud1	64209	6	259.522	777.244	810.885	2.99491	3.12454	1.04328	0.958514
1455405_at	Pstpip2	19201	6	32.7525	106.733	112.264	3.25877	3.42763	1.05182	0.950735
1422953_at	Fpr2	14289	6	24.2401	218.522	230.295	9.01487	9.50058	1.05388	0.948876
1417822_at	D17H6S56E-5	110956	6	47.4822	121.229	163.855	2.55315	3.45088	1.35162	0.739855
1450808_at	Fpr1	14293	6	56.7056	127.107	197.522	2.24152	3.48328	1.55398	0.643508
1449399_a_at	Il1b	16176	6	13.6882	35.5278	58.7073	2.5955	4.28889	1.65243	0.605168
1448046_at	Rabepk	227746	6	39.7739	71.207	135.588	1.79029	3.40896	1.90413	0.525174
1420591_at	Gpr84	80910	6	15.6906	126.188	242.855	8.04229	15.4777	1.92454	0.519604
1418206_at	Sdf2l1	64136	6	83.5234	162.271	331.264	1.94281	3.96612	2.04143	0.489853
